# Supplementary material for: Discovery of the 1-naphthylamine biodegradation pathway reveals a broad-substrate-spectrum enzyme catalyzing 1-naphthylamine glutamylation
Source: eLife journal article supplement (doi:10.7554/elife.95555), 2024-07-26
Supplement: fig1-data1 [file Figure_1-source_data_1.xlsx]

## Sheet: Fig.1
	Fig.1 Degradation of 1NA by Pseudomonas sp. strain JS3066.
Fig. 1A	Time (h)	Growth of strain JS3066 with 1NA			Growth of strain JS3066 without 1NA			Consumption of 1NA by strain JS3066			Control 1NA
		Y1	Y2	STDEV	Y1	Y2	STDEV	Y1	Y2	STDEV	Y1	Y2	STDEV
	0	0.022	0.021	0.000707107	0.022	0.02	0.00141421	0.34	0.35	0.00707107	0.35	0.33	0.0141421
	5	0.017	0.016	0.000707107	0.02	0.018	0.00141421	0.34	0.33	0.00707107	0.34	0.33	0.00707107
	10	0.019	0.017	0.00141421	0.019	0.019	0	0.3	0.28	0.0141421	0.35	0.33	0.0141421
	15	0.019	0.022	0.00212132	0.018	0.019	0.000707107	0.25	0.23	0.0141421	0.34	0.32	0.0141421
	20	0.031	0.033	0.00141421	0.018	0.017	0.000707107	0.18	0.15	0.0212132	0.31	0.3	0.00707107
	25	0.056	0.059	0.00212132	0.018	0.015	0.00212132	0.1	0.08	0.0141421	0.32	0.29	0.0212132
	30	0.079	0.081	0.00141421	0.016	0.015	0.000707107	0.03	0.02	0.00707107	0.31	0.3	0.00707107
	35	0.085	0.083	0.00141421	0.017	0.015	0.00141421	0	0	0	0.3	0.32	0.0141421
	40	0.077	0.08	0.00212132	0.016	0.014	0.00141421	0	0	0	0.33	0.29	0.0282843
Fig. 1B	Time (h)	KT/pNPA01-ΔA2			KT/pNPA01			KT/pNPA01-ΔA1			KT/pNPA01-ΔA12			Chasis cell only			No chasis cell
		Y1	Y2	STDEV	Y1	Y2	STDEV	Y1	Y2	STDEV	Y1	Y2	STDEV	Y1	Y2	STDEV	Y1	Y2	STDEV
	0	0.41	0.39	0.0141421	0.4	0.39	0.00707107	0.4	0.38	0.0141421	0.41	0.37	0.0282843	0.41	0.38	0.0212132	0.41	0.4	0.00707107
	3	0.31	0.3	0.00707107	0.39	0.38	0.00707107	0.38	0.41	0.0212132	0.4	0.38	0.0141421	0.4	0.39	0.00707107	0.39	0.4	0.00707107
	6	0.21	0.23	0.0141421	0.38	0.37	0.00707107	0.39	0.38	0.00707107	0.38	0.39	0.00707107	0.38	0.4	0.0141421	0.41	0.38	0.0212132
	9	0.16	0.17	0.00707107	0.35	0.36	0.00707107	0.37	0.39	0.0141421	0.38	0.37	0.00707107	0.39	0.38	0.00707107	0.39	0.38	0.00707107
	12	0.12	0.13	0.00707107	0.34	0.36	0.0141421	0.39	0.36	0.0212132	0.39	0.36	0.0212132	0.4	0.36	0.0282843	0.4	0.37	0.0212132
	15	0.09	0.1	0.00707107	0.33	0.32	0.00707107	0.38	0.37	0.00707107	0.38	0.37	0.00707107	0.38	0.37	0.00707107	0.39	0.38	0.00707107
	18	0.05	0.04	0.00707107	0.3	0.28	0.0141421	0.37	0.38	0.00707107	0.38	0.36	0.0141421	0.37	0.39	0.0141421	0.37	0.39	0.0141421
	21	0	0	0	0.28	0.26	0.0141421	0.38	0.36	0.0141421	0.37	0.39	0.0141421	0.39	0.37	0.0141421	0.38	0.37	0.00707107
(A) Growth with 1NA as the sole carbon and nitrogen source. (B) 1NA conversion by cell suspensions of P. putida KT2440-DcatADggt harboring pNPA01 (npaA1 to npaA5), pNPA01-DA1 (npaA2 to npaA5), pNPA01-DA2 (npaA1 and npaA3 to npaA5), and pNPA01-DA12 (npaA3 to npaA5). The ability of P. putida KT2440-DcatADggt to convert 1NA together with spontaneous decomposition of 1NA were also determined as contr…
