# Supplementary material for: Discovery of the 1-naphthylamine biodegradation pathway reveals a broad-substrate-spectrum enzyme catalyzing 1-naphthylamine glutamylation
Source: eLife journal article supplement (doi:10.7554/elife.95555), 2024-07-26
Supplement: fig2-data1 [file Figure_2-source_data_1.xlsx]

## Sheet: Figure_2-source_data-1
	Fig.2 Conversion of 1NA by recombinant protein NpaA1.
Figure 2A	Time (min)	1NA			g-glutamylated 1NA
		Y1	Y2	STDEV	Y1	Y2	STDEV
	0	0.153	0.156	0.00212132	0	0	0
	1	0.114	0.118	0.00282843	0.039	0.038	0.000707107
	2	0.102	0.104	0.00141421	0.051	0.049	0.00141421
	3	0.079	0.081	0.00141421	0.074	0.072	0.00141421
	4	0.059	0.06	0.000707107	0.094	0.091	0.00212132
	5	0.035	0.034	0.000707107	0.118	0.12	0.00141421
	6	0.016	0.014	0.00141421	0.14	0.139	0.000707107
	7	0	0	0	0.146	0.149	0.00212132
	(A) The time course of 1NA degradation and γ-glutamylated 1NA accumulation. The results are shown as averages ± standard deviations from two or more independent measurements.
Figure 2C
Figure 2D
	(C-D) UPLC/QTOF-MS analysis of the intermediate captured during 1NA transformation by NpaA1. The mass spectra of authentic γ-glutamylated 1NA (C) and reaction product γ-glutamylated 1NA (D).
