# Supplementary material for: Discovery of the 1-naphthylamine biodegradation pathway reveals a broad-substrate-spectrum enzyme catalyzing 1-naphthylamine glutamylation
Source: eLife journal article supplement (doi:10.7554/elife.95555), 2024-07-26
Supplement: fig2-figsupp1-data1 [file Figure_2-figure_supplement_1-source_data_1.xlsx]

## Sheet: Figure 2-figure supplement1
Figure 2─figure supplement 1. Spectral changes during the transformation of 1NA by purified N-terminal Strep II-tagged NpaA1. The maximum characteristic absorption peaks of 1NA and γ-glutamylated 1NA are 310 nm and 287 nm. The arrows indicate the directions of spectral changes.
	nm	A	A	A	A	A	A	A	A	A	A	A	A
	400	0.0069	0.00527	0.0054	0.00558	0.00561	0.00551	0.00553	0.00564	0.00555	0.00575	0.00583	0.00588
	399	0.00673	0.00532	0.00545	0.00558	0.00561	0.00557	0.00554	0.00556	0.0056	0.0057	0.00574	0.00578
	398	0.00674	0.00522	0.00529	0.00546	0.00548	0.0055	0.00544	0.00541	0.00548	0.00566	0.00571	0.00569
	397	0.00677	0.00541	0.00545	0.00565	0.00568	0.0056	0.00558	0.00559	0.0057	0.00568	0.00575	0.00591
	396	0.0068	0.00536	0.00552	0.0056	0.00565	0.00556	0.00553	0.00555	0.00555	0.0058	0.00583	0.00586
	395	0.00677	0.0054	0.00554	0.00571	0.00574	0.00576	0.00561	0.00563	0.00574	0.00575	0.00591	0.00597
	394	0.00674	0.00535	0.00557	0.00562	0.00569	0.00562	0.00561	0.00561	0.00567	0.0058	0.00589	0.00602
	393	0.0068	0.00542	0.00556	0.00569	0.00572	0.0057	0.00565	0.00551	0.00565	0.00575	0.00586	0.00588
	392	0.0068	0.00548	0.00555	0.00568	0.00566	0.0057	0.00559	0.0056	0.00562	0.00577	0.00591	0.00596
	391	0.00681	0.00539	0.00552	0.00567	0.00568	0.00561	0.00549	0.00552	0.00558	0.00571	0.00577	0.00584
	390	0.00684	0.00561	0.00564	0.00571	0.00575	0.00577	0.00566	0.00568	0.00564	0.0059	0.00589	0.00598
	389	0.00684	0.0054	0.00571	0.00572	0.00578	0.00566	0.00563	0.00563	0.00574	0.00583	0.00593	0.00599
	388	0.00678	0.00546	0.00549	0.00569	0.00576	0.0056	0.00556	0.00549	0.00566	0.00576	0.00578	0.00585
	387	0.00682	0.00545	0.00563	0.00572	0.00576	0.00574	0.00574	0.00566	0.00574	0.00584	0.0059	0.00592
	386	0.00676	0.00559	0.0057	0.00577	0.00578	0.00588	0.00565	0.00565	0.00576	0.00584	0.00597	0.00604
	385	0.00686	0.00557	0.00568	0.0058	0.00575	0.00574	0.00574	0.00577	0.00565	0.00593	0.00587	0.00598
	384	0.00685	0.00563	0.00562	0.00581	0.00588	0.00559	0.00557	0.00553	0.00562	0.00578	0.0059	0.00593
	383	0.0067	0.00615	0.00545	0.00552	0.00543	0.00533	0.00557	0.00521	0.00525	0.00544	0.00565	0.00584
	382	0.0065	0.00574	0.00544	0.00605	0.00569	0.00596	0.00586	0.00536	0.00587	0.00572	0.00573	0.00587
	381	0.00685	0.00591	0.00616	0.00576	0.00598	0.00587	0.0056	0.00549	0.00575	0.00517	0.00551	0.00595
	380	0.00672	0.00555	0.00554	0.00562	0.00565	0.00558	0.00591	0.00557	0.00558	0.00585	0.00573	0.00577
	379	0.00686	0.00575	0.00577	0.00575	0.00603	0.00577	0.00581	0.00559	0.00556	0.00591	0.0055	0.00579
	378	0.00712	0.00579	0.00603	0.00614	0.00604	0.00603	0.00585	0.00556	0.00557	0.00595	0.00579	0.00606
	377	0.00719	0.00603	0.00595	0.0061	0.00603	0.00609	0.00585	0.00569	0.00554	0.00599	0.00602	0.00618
	376	0.00709	0.00614	0.00613	0.00648	0.00611	0.00622	0.00596	0.00569	0.00597	0.00615	0.00609	0.00629
	375	0.00721	0.00631	0.00612	0.0063	0.00633	0.00616	0.00589	0.00594	0.00581	0.00605	0.00586	0.00598
	374	0.00734	0.00615	0.00632	0.00647	0.00634	0.00621	0.00602	0.0058	0.0058	0.00605	0.00606	0.00603
	373	0.00739	0.00638	0.00626	0.00649	0.0064	0.00621	0.00607	0.00584	0.00585	0.00582	0.00603	0.00627
	372	0.00757	0.00667	0.0065	0.00667	0.00648	0.00649	0.00623	0.00615	0.00605	0.00628	0.00616	0.0062
	371	0.00753	0.00652	0.00647	0.00666	0.00654	0.00619	0.00618	0.00587	0.00599	0.00596	0.00616	0.00596
	370	0.00783	0.00688	0.00694	0.00695	0.00674	0.00663	0.00634	0.00611	0.00609	0.00621	0.0062	0.00628
	369	0.00802	0.00715	0.007	0.00688	0.00685	0.00667	0.00626	0.00622	0.00606	0.00619	0.00611	0.00615
	368	0.00817	0.00728	0.00716	0.00714	0.00705	0.00691	0.00667	0.00619	0.00626	0.00612	0.00634	0.00647
	367	0.00857	0.00757	0.00739	0.00727	0.00712	0.00671	0.00662	0.00623	0.00624	0.00626	0.00613	0.00611
	366	0.00868	0.00764	0.00751	0.00745	0.00727	0.00707	0.00662	0.00645	0.0061	0.00626	0.00612	0.00622
	365	0.00937	0.00824	0.00786	0.00775	0.00765	0.00736	0.00716	0.00667	0.00663	0.00639	0.00622	0.00653
	364	0.00958	0.00845	0.00823	0.00819	0.00773	0.00743	0.00707	0.00684	0.00659	0.00647	0.00641	0.0064
	363	0.00995	0.00878	0.00853	0.00827	0.00784	0.00757	0.00703	0.00667	0.00643	0.00633	0.0061	0.0062
	362	0.0106	0.00934	0.00897	0.00881	0.00835	0.00791	0.00754	0.00702	0.00687	0.00655	0.00631	0.0065
	361	0.01111	0.00993	0.0095	0.00903	0.0086	0.00835	0.00766	0.00721	0.00682	0.0066	0.0064	0.00653
	360	0.01175	0.0104	0.00983	0.00949	0.00887	0.0084	0.00791	0.00732	0.00698	0.00665	0.00646	0.00659
	359	0.01243	0.01099	0.01036	0.00994	0.00931	0.00873	0.00806	0.00747	0.00703	0.00671	0.00634	0.00652
	358	0.01329	0.01176	0.01107	0.01059	0.00995	0.00907	0.00861	0.00777	0.00726	0.00683	0.00655	0.00654
	357	0.01386	0.01241	0.01172	0.01123	0.01035	0.00951	0.00865	0.00797	0.0073	0.0068	0.00646	0.00651
	356	0.01515	0.01346	0.01247	0.01178	0.01082	0.00983	0.0093	0.00844	0.00754	0.00701	0.0065	0.00656
	355	0.01614	0.01414	0.01315	0.01234	0.01126	0.01051	0.00952	0.00851	0.00761	0.00687	0.00642	0.00642
	354	0.01747	0.01558	0.01439	0.01343	0.01234	0.01123	0.01	0.00908	0.00795	0.00732	0.00661	0.00677
	353	0.01904	0.01694	0.01549	0.01432	0.01311	0.01182	0.01068	0.00941	0.00841	0.00746	0.00674	0.00682
	352	0.02055	0.01805	0.01664	0.01503	0.01387	0.01255	0.01098	0.00964	0.00857	0.00745	0.00643	0.00663
	351	0.02196	0.01953	0.01775	0.0164	0.01481	0.01306	0.01157	0.01006	0.0088	0.00753	0.00658	0.00658
	350	0.02423	0.02148	0.01958	0.01793	0.01595	0.01423	0.01263	0.01058	0.00927	0.00796	0.00687	0.00676
	349	0.0264	0.02331	0.02119	0.01922	0.01739	0.01526	0.01315	0.01117	0.00949	0.00797	0.00662	0.00675
	348	0.02881	0.0256	0.02298	0.02107	0.01873	0.01628	0.01412	0.01205	0.00977	0.00845	0.00684	0.007
	347	0.03179	0.02783	0.02536	0.02281	0.02019	0.01758	0.01529	0.01278	0.01031	0.00841	0.00671	0.0067
	346	0.03463	0.03073	0.0277	0.02458	0.02173	0.01906	0.01634	0.01339	0.01089	0.00868	0.00667	0.00673
	345	0.03827	0.034	0.03055	0.027	0.02379	0.02076	0.01746	0.01436	0.01164	0.00908	0.00681	0.00704
	344	0.04204	0.0372	0.03339	0.02974	0.02603	0.02253	0.01905	0.01528	0.0121	0.00928	0.00682	0.00697
	343	0.04651	0.04108	0.03692	0.03253	0.02846	0.02457	0.02057	0.01659	0.01303	0.00981	0.00709	0.007
	342	0.05119	0.04523	0.04053	0.03554	0.03111	0.02664	0.02229	0.01757	0.01385	0.00997	0.00685	0.00673
	341	0.0565	0.04981	0.04434	0.03901	0.03396	0.02916	0.02423	0.01884	0.01436	0.01038	0.00701	0.00685
	340	0.06238	0.05519	0.04882	0.0428	0.03722	0.03168	0.02613	0.0205	0.01549	0.0108	0.00706	0.00696
	339	0.06899	0.06096	0.05405	0.04715	0.04081	0.03474	0.0286	0.02228	0.01652	0.01158	0.00717	0.00734
	338	0.0754	0.06692	0.05876	0.05166	0.04439	0.03755	0.03092	0.02376	0.01727	0.01167	0.00692	0.00691
	337	0.08282	0.07347	0.06455	0.05658	0.04843	0.04082	0.03336	0.02574	0.01876	0.01229	0.00694	0.00681
	336	0.09125	0.08066	0.07106	0.06235	0.05322	0.04464	0.03656	0.02787	0.02033	0.01322	0.00723	0.00715
	335	0.10049	0.08842	0.07804	0.06778	0.05825	0.0487	0.03963	0.03021	0.02167	0.01406	0.00728	0.00737
	334	0.11001	0.09695	0.08524	0.07439	0.06338	0.05342	0.04312	0.03258	0.02325	0.01483	0.00763	0.00751
	333	0.12056	0.10608	0.09343	0.0811	0.06961	0.0579	0.0468	0.03535	0.02486	0.01539	0.00786	0.00754
	332	0.13136	0.11567	0.10157	0.08838	0.07531	0.06293	0.05075	0.03796	0.02684	0.01643	0.00787	0.00766
	331	0.14223	0.12527	0.10998	0.09538	0.08126	0.06765	0.05472	0.04066	0.02855	0.01723	0.00786	0.00779
	330	0.15369	0.13501	0.11868	0.10307	0.08812	0.0733	0.05915	0.04386	0.03081	0.01874	0.00847	0.00842
	329	0.16321	0.14425	0.1263	0.10958	0.09352	0.07756	0.06242	0.04654	0.03272	0.01966	0.00905	0.00875
	328	0.1717	0.15201	0.13311	0.11567	0.09872	0.08215	0.06594	0.04945	0.03455	0.02099	0.00942	0.00911
	327	0.17834	0.15775	0.1385	0.12035	0.10295	0.08589	0.06943	0.05219	0.03701	0.02245	0.01135	0.01118
	326	0.18295	0.16174	0.14236	0.12401	0.1061	0.08895	0.072	0.05452	0.0393	0.02461	0.01319	0.01299
	325	0.18515	0.16388	0.14436	0.12572	0.10807	0.09066	0.07376	0.05637	0.04099	0.02635	0.01498	0.01461
	324	0.18639	0.16524	0.14579	0.12739	0.10959	0.09262	0.07579	0.05841	0.04301	0.02836	0.01704	0.01711
	323	0.18809	0.16711	0.14788	0.12959	0.11169	0.09455	0.07808	0.06082	0.04553	0.03121	0.01993	0.01964
	322	0.19042	0.16961	0.15039	0.13204	0.11449	0.09755	0.08099	0.06371	0.04864	0.03412	0.02298	0.02289
	321	0.1935	0.17282	0.15344	0.13552	0.11789	0.10085	0.08427	0.06721	0.05202	0.03762	0.02645	0.02635
	320	0.19765	0.17688	0.15769	0.13949	0.1218	0.1047	0.08838	0.07104	0.05586	0.04156	0.03046	0.03031
	319	0.20141	0.1808	0.16175	0.14354	0.12595	0.1089	0.09252	0.07548	0.06025	0.04607	0.03505	0.03494
	318	0.2052	0.18462	0.16577	0.14777	0.13037	0.11347	0.09695	0.0801	0.06507	0.05091	0.04014	0.03988
	317	0.20869	0.18828	0.16964	0.15168	0.1343	0.11761	0.10146	0.08463	0.06977	0.05565	0.04498	0.04489
	316	0.21163	0.19161	0.17306	0.15544	0.13811	0.12161	0.10572	0.08883	0.07419	0.0603	0.04975	0.04969
	315	0.21475	0.19446	0.17612	0.15883	0.14177	0.12544	0.10954	0.093	0.07842	0.06479	0.05411	0.05422
	314	0.2171	0.1973	0.17929	0.16226	0.14534	0.12929	0.1137	0.0975	0.08347	0.06975	0.05953	0.05948
	313	0.21907	0.19987	0.18217	0.16559	0.1493	0.13357	0.11835	0.10253	0.08858	0.07556	0.0655	0.0653
	312	0.21997	0.20142	0.18424	0.16805	0.15222	0.1368	0.12212	0.10676	0.09306	0.0803	0.07063	0.07039
	311	0.22085	0.20263	0.18603	0.17007	0.15449	0.13966	0.12522	0.11008	0.09696	0.08456	0.07494	0.07499
	310	0.22155	0.20391	0.18742	0.17204	0.15701	0.14239	0.12853	0.1139	0.10089	0.0889	0.07973	0.07975
	309	0.2225	0.20553	0.18976	0.17481	0.16045	0.14632	0.13296	0.11891	0.10656	0.09483	0.08602	0.08603
	308	0.22397	0.20773	0.1926	0.17814	0.16441	0.15091	0.13787	0.12441	0.11262	0.10145	0.09312	0.09312
	307	0.22552	0.20994	0.19557	0.18204	0.1687	0.15588	0.14343	0.1306	0.1194	0.10874	0.10069	0.10075
	306	0.22745	0.21256	0.19893	0.1858	0.17338	0.16123	0.1495	0.13721	0.12652	0.1163	0.10861	0.10891
	305	0.22862	0.21454	0.20188	0.18963	0.17763	0.16644	0.15522	0.14355	0.13363	0.12403	0.11697	0.11699
	304	0.22982	0.21661	0.20472	0.19345	0.18247	0.17194	0.16138	0.15074	0.14164	0.13262	0.12598	0.12627
	303	0.23007	0.21809	0.20729	0.19703	0.187	0.17732	0.16796	0.15818	0.14991	0.14174	0.13592	0.13583
	302	0.22971	0.21907	0.20926	0.20031	0.19118	0.18264	0.17431	0.16557	0.15801	0.15116	0.14582	0.14579
	301	0.22879	0.21941	0.21094	0.20294	0.19522	0.18759	0.18041	0.17287	0.16623	0.16014	0.15569	0.15575
	300	0.22756	0.21964	0.21257	0.20611	0.19967	0.1933	0.18727	0.18101	0.17548	0.17051	0.16674	0.1668
	299	0.22561	0.21956	0.21407	0.2087	0.20389	0.19903	0.19427	0.18964	0.18551	0.18154	0.17882	0.179
	298	0.2231	0.21898	0.21517	0.21194	0.20875	0.20519	0.20202	0.19897	0.19587	0.19333	0.19156	0.19196
	297	0.22044	0.21811	0.21627	0.2146	0.21257	0.21113	0.20928	0.20756	0.20637	0.20488	0.20428	0.20458
	296	0.21766	0.21727	0.21733	0.21736	0.21755	0.21743	0.21748	0.21755	0.21794	0.21781	0.21798	0.21839
	295	0.21449	0.2161	0.21814	0.22027	0.22224	0.22414	0.22604	0.22777	0.22957	0.23138	0.23259	0.23289
	294	0.21084	0.2146	0.21863	0.22277	0.22656	0.23006	0.23379	0.23727	0.241	0.24437	0.24682	0.24713
	293	0.20672	0.21285	0.21888	0.22511	0.23084	0.23609	0.24155	0.24702	0.25203	0.25712	0.2606	0.2609
	292	0.20271	0.21056	0.21853	0.22642	0.23389	0.24079	0.24778	0.25496	0.26171	0.26811	0.27253	0.27265
	291	0.19778	0.2072	0.21715	0.2263	0.23489	0.24332	0.2514	0.25981	0.26797	0.27549	0.28094	0.28081
	290	0.19283	0.20374	0.2144	0.22453	0.23432	0.2439	0.25315	0.26264	0.2711	0.27956	0.28586	0.28583
	289	0.18673	0.19873	0.20997	0.22146	0.23194	0.24196	0.25221	0.26224	0.27232	0.28089	0.2877	0.28771
	288	0.18067	0.19356	0.20614	0.21814	0.22976	0.24093	0.25134	0.26253	0.27268	0.28264	0.28963	0.28985
	287	0.17359	0.18775	0.20105	0.2138	0.22622	0.2382	0.2497	0.26128	0.27294	0.28289	0.2899	0.29037
	286	0.16473	0.17902	0.1934	0.20708	0.22042	0.23234	0.24498	0.25733	0.2692	0.28071	0.28789	0.28779
	285	0.15402	0.17012	0.18392	0.19967	0.21273	0.22681	0.23944	0.25196	0.2641	0.27614	0.28312	0.28417
	284	0.14299	0.15919	0.17659	0.19034	0.20627	0.21889	0.2334	0.2471	0.25752	0.27071	0.2793	0.27878
	283	0.13285	0.14981	0.16796	0.18361	0.19208	0.21169	0.22419	0.2367	0.2483	0.26396	0.26887	0.2714
	282	0.12453	0.14225	0.15227	0.17201	0.18988	0.19391	0.21142	0.2179	0.22447	0.23885	0.24906	0.25544
	281	0.13565	0.13205	0.14756	0.17222	0.17767	0.15612	0.19764	0.16136	0.1906	0.20071	0.21384	0.21686
	280	0.11674	0.15334	0.14465	0.15118	0.16152	0.21093	0.19413	0.1543	0.20259	0.12324	0.16807	0.18832
	279	0.10737	0.14667	0.14228	0.12497	0.10248	0.15561	0.16288	0.1109	0.08703	0.09296	0.10107	0.13129
	278	0.1142	0.12875	0.14696	0.12649	0.11353	0.14732	0.16674	0.05818	0.07338	0.04329	0.11469	0.08875
	277	0.09314	0.11982	0.15973	0.11714	0.06193	0.12739	0.17169	0.09165	0.11348	0.07529	0.04785	0.07228
	276	0.11434	0.11848	0.13196	0.18453	0.14317	0.08423	0.17623	-0.01913	0.13075	0.06015	0.09465	0.12629
	275	0.09831	0.20015	0.1964	0.10825	0.10162	0.13381	0.0917	0.02265	-0.02161	-0.02186	0.06721	0.09787
	274	0.19871	0.19025	0.1635	0.17651	0.09835	0.15443	0.10034	0.0717	0.08551	0.02092	0.07401	-0.00771
	273	0.06468	0.09493	0.03693	0.1132	0.09807	0.07397	0.19452	0.03898	0.05713	0.06133	0.02204	-0.00692
	272	0.05902	0.16591	0.10931	0.07395	0.06503	0.11044	0.08808	-0.01313	0.06307	-0.06477	0.05363	0.00144
	271	-0.00489	0.02306	0.00808	0.04156	0.05875	-0.06419	-0.02335	-0.08406	-0.07058	-0.17236	0.05183	-0.02754
	270	0.03058	0.04144	0.11447	0.14379	0.13041	0.07563	0.13397	0.01819	0.08818	0.1565	0.04609	-0.03239
	269	0.04945	0.11303	0.17347	0.09979	0.01464	0.08939	0.16127	-0.05995	-0.05202	-0.02859	-0.0853	-0.03312
	268	-0.17804	0.11074	-0.10567	0.15905	0.0005	0.07342	-0.07989	-0.25498	-0.12936	-0.02817	-0.10211	0.08383
	267	-0.00286	0.06877	0.23958	-0.00239	0.24185	0.17927	0.14191	-0.09935	-0.12679	-0.11367	-0.02851	-0.14644
	266	0.1348	0.27908	0.05148	0.12022	0.03874	0.12674	0.09233	0.000874	0.0313	-0.08965	-0.15242	-0.08412
	265	0.20377	0.01423	-0.02328	0.18114	0.03516	0.19542	0.05883	-0.22337	-0.22218	0.01535	-0.32193	0.12943
	264	0.02839	0.15518	0.10982	-0.1834	0.02181	-0.16036	0.17087	-0.19113	0.09837	-0.11794	-0.11889	-0.33484
	263	0.08249	0.0703	0.12076	0.05128	0.05479	0.14695	-0.02762	0.00378	-0.06005	0.11488	-0.04913	0.21589
	262	0.03035	0.12397	-0.01516	0.06622	0.1975	-0.0248	0.0398	-0.18321	-0.10153	-0.03452	-0.12144	-0.05389
	261	0.14835	0.28143	0.15806	0.00725	-0.14436	0.12959	0.1448	-0.10691	-0.08208	-0.1351	-0.12951	-0.08141
	260	0.06357	0.24151	0.08359	0.07555	0.0681	0.02864	-0.00582	-0.1608	-0.27489	0.02532	-0.29246	-0.10943
	259	0.0679	0.01603	-0.03201	0.27083	-0.01937	0.33797	0.14141	-0.10488	-0.37406	-0.18447	0.04024	0.1976
	258	0.06885	0.14439	-0.02746	-0.1045	0.09694	-0.05538	0.04482	-0.09918	0.02726	-0.1245	-0.17946	0.1485
	257	-0.08355	0.17064	-0.09576	-0.12162	-0.02787	0.04134	-0.08756	-0.24525	-0.12361	-0.26552	-0.05381	-0.06905
	256	-0.26467	-0.01087	0.22588	-0.18395	-0.14871	0.000737	0.0417	-0.25759	-0.29832	-0.23346	-0.11564	-0.04896
	255	-0.12963	0.05793	0.19446	-0.24161	-0.10662	-0.13716	-0.16275	-0.31405	-0.38734	-0.33294	-0.40318	-0.3625
	254	-0.02382	0.4246	0.22069	-0.1182	0.06562	-0.00783	-0.028	-0.1089	-0.29526	-0.18765	-0.27363	-0.0465
	253	0.33319	-0.01216	0.07694	-0.02821	-0.0099	0.18251	0.02421	-0.29816	-0.12543	-0.07215	0.03828	-0.29744
	252	-0.03874	0.15947	0.14072	-0.06246	0.27619	-0.0508	0.25637	-0.08394	-0.09074	-0.08469	-0.00943	-0.22429
	251	0.12029	0.13942	0.13427	-0.24102	0.11805	0.51202	-0.03235	-0.18559	-0.1932	-0.13118	0.00167	0.12931
	250	-0.15476	0.24277	-0.16923	-0.20494	-0.21311	-0.19844	-0.04161	-0.33215	-0.40662	-0.26714	-0.26337	-0.32142
	249	-0.12313	-0.06656	0.04895	-0.1858	0.21418	-0.02163	0.09716	-0.21433	-0.33552	-0.16371	-0.11203	-0.42091
	248	0.06405	0.11894	0.27104	0.02892	0.12808	0.04722	-0.00586	-0.23226	-0.37801	-0.39305	-0.10504	-0.28514
	247	0.10984	0.06133	-0.32053	-0.13935	-0.05801	-0.09661	-0.19768	-0.12446	-0.32514	-0.04298	-0.18152	-0.38135
	246	-0.12735	-0.11854	-0.16746	-0.26799	0.01646	0.08086	-0.12887	-0.41362	-0.34974	-0.00912	-0.12611	-0.17253
	245	0.01281	-0.00763	-0.08864	0.11397	-0.09568	0.07927	0.11811	0.09858	-0.28329	0.01402	-0.24947	0.36075
	244	-0.36093	0.04263	-0.04718	-0.07037	-0.13807	-0.04671	-0.02007	-0.18125	-0.30094	-0.21148	-0.28574	-0.16124
	243	-0.09243	0.13919	-0.05562	8.7e-05	0.00375	0.09943	-0.06605	-0.23233	-0.33932	-0.08842	-0.10863	-0.04055
	242	-0.16682	-0.1397	-0.000881	-0.07551	0.0721	-0.12168	-0.0741	-0.31529	-0.16617	-0.32885	-0.19668	-0.0737
	241	-0.18361	-0.12472	-0.07962	-0.262	-0.18737	-0.22193	-0.09507	-0.19382	-0.22959	-0.14175	-0.31182	-0.39053
	240	-0.44723	-0.41904	-0.24579	-0.23088	-0.08631	-0.17095	0.00519	-0.16253	-0.40925	-0.18461	-0.29495	-0.36126
	239	-0.2137	0.03385	-0.20535	-0.21333	-0.11323	0.10228	-0.02545	-0.17144	-0.33227	-0.04216	-0.0824	-0.11954
	238	-0.40341	-0.17526	-0.20855	-0.44568	-0.14528	-0.2037	-0.15299	-0.31732	-0.30259	-0.18252	-0.22895	-0.02991
	237	-0.2306	-0.04955	0.20476	-0.02514	-0.10124	-0.24594	0.14676	0.0182	-0.14958	0.08285	-0.17178	0.0415
	236	-0.41004	-0.10506	-0.11917	-0.33771	-0.27651	-0.09127	-0.21353	-0.42396	-0.27899	-0.12572	-0.06681	0.22635
	235	-0.26433	-0.1636	-0.14582	-0.25553	-0.19282	-0.06883	-0.10428	-0.34114	-0.17586	-0.21342	-0.17623	-0.20588
	234	-0.23507	-0.16522	-0.23246	-0.32756	-0.10681	0.01437	-0.09386	-0.30276	-0.16531	-0.35058	-0.04885	-0.14044
	233	-0.18332	-0.31225	-0.17348	-0.33005	-0.07819	-0.2472	-0.10987	-0.32437	-0.22417	0.17512	-0.13794	0.02777
	232	-0.17666	-0.10814	-0.30727	-0.24671	-0.1045	-0.16989	-0.14383	-0.20786	-0.15874	-0.11848	-0.15002	0.33102
	231	-0.16129	-0.11356	0.05426	-0.13234	-0.17173	-0.0353	0.04649	-0.09362	-0.01215	-0.12122	0.18838	0.07504
	230	-0.35553	-0.32595	-0.35183	-0.25403	-0.1997	-0.29175	-0.21199	-0.43935	-0.29546	-0.26503	-0.30027	0.14336
	229	-0.2963	-0.24088	-0.25965	-0.21578	-0.17227	-0.06859	-0.07372	-0.15476	-0.20196	-0.3861	-0.17554	-0.26988
	228	-0.00252	-0.0376	-0.14196	-0.15105	-0.06941	0.07306	-0.0317	-0.11367	-0.06573	0.04422	-0.03343	0.08771
	227	-0.27908	-0.21082	-0.35521	-0.30672	-0.04609	-0.39266	-0.23754	-0.31848	-0.07786	-0.42272	-0.33333	-0.04126
	226	-0.05157	-0.24257	-0.1014	-0.04513	-0.17117	-0.15985	0.02316	-0.33451	-0.16403	0.01672	0.09215	0.31365
	225	-0.24776	-0.23035	-0.53829	-0.22608	-0.30694	-0.03304	-0.04329	-0.23762	-0.3895	-0.17469	-0.04958	-0.15001
	224	-0.39385	-0.24301	0.01109	-0.32087	-0.1032	-0.18924	-0.0032	-0.42372	0.06449	-0.27249	-0.20115	-0.2564
	223	-0.17004	-0.12496	-0.10508	-0.10522	-0.16766	-0.22399	-0.2832	-0.23653	-0.29293	-0.31164	-0.17143	-0.11811
	222	-0.19393	-0.30247	-0.04906	-0.31779	-0.17993	0.01232	-0.09698	-0.3573	-0.39841	-0.3344	-0.24708	-0.3797
	221	-0.18256	-0.18241	-0.0601	-0.19697	-0.18279	-0.11866	0.02023	-0.34176	-0.30712	-0.23059	-0.45177	-0.19268
	220	-0.26052	-0.11893	-0.26386	-0.12527	-0.5058	-0.01538	-0.19109	-0.32895	-0.4587	-0.20169	-0.12926	-0.1044
	219	-0.21158	-0.1786	-0.0709	-0.34512	-0.30479	-0.11927	-0.08941	-0.18751	-0.51735	-0.3279	-0.23109	-0.16452
	218	-0.2574	0.01882	-0.1616	-0.14554	-0.13836	-0.04577	0.0389	-0.45756	-0.28503	-0.0401	-0.14124	0.0154
	217	0.15416	0.12026	0.00462	-0.1704	-0.12154	0.29915	-0.12174	-0.28104	-0.4606	0.04262	-0.08624	0.222
	216	-0.00161	-0.06683	-0.13347	-0.0012	-0.01196	-0.1131	-0.07147	-0.42055	-0.07362	-0.17456	-0.2549	0.19393
	215	-0.1546	0.06595	-0.06223	-0.18817	-0.09806	-0.06445	-0.2333	-0.29995	-0.23407	-0.33781	-0.15333	-0.10322
	214	-0.24588	-0.24392	-0.18508	-0.22277	-0.15738	0.43206	-0.15057	-0.25766	-0.34723	-0.38816	-0.22649	-0.29302
	213	0.13619	-0.11697	-0.04244	-0.14856	-0.35229	-0.04576	-0.16126	0.14305	0.05566	0.07291	-0.34789	-0.61941
	212	-0.48038	0.05749	-0.37959	-0.24555	-0.08483	-0.23168	-0.14415	-0.01583	-0.38079	-0.25059	-0.39967	0.06603
	211	-0.15435	-0.00339	-0.16478	-0.23393	0.2078	-0.12752	-0.07185	-0.32955	-0.17789	-0.35144	0.08437	-0.02729
	210	-0.04179	-0.10935	-0.09219	-0.01891	-0.28236	-0.10699	0.01339	-0.32711	-0.10225	-0.10489	-0.05195	0.29522
	209	-0.13114	-0.14002	-0.36183	-0.00788	-0.10197	-0.13437	-0.25872	-0.32428	-0.3157	-0.53117	-0.11229	0.10878
	208	0.09906	0.09445	-0.20229	-0.17828	0.09377	-0.01011	0.06095	-1.21811	-0.49353	-0.16515	-0.11217	-0.14622
	207	-0.39999	-0.24319	-0.42344	-0.25563	-0.16759	-0.40873	-0.01218	-1.16436	-0.32507	-0.5845	-0.4629	-0.43464
	206	-0.24545	-0.10156	-0.1834	-0.54305	-0.258	-0.31154	-0.12117	-0.60741	-0.33079	-0.4771	-0.34714	-0.03541
	205	0.00448	0.10646	0.0674	-0.1032	-0.27634	0.06618	-0.04957	-0.82854	-0.57912	-0.08911	-0.71099	-0.09583
	204	-0.28741	0.09723	-0.124	-0.18638	-0.26304	-0.17508	-0.37683	-0.38963	-0.34756	-0.26941	-0.08591	0.08136
	203	-0.31475	-0.02703	-0.00257	-0.1788	-0.20658	-0.03143	-0.20243	-0.38131	-0.03858	-0.34223	-0.49766	-0.48086
	202	0.05923	0.04103	-0.02173	-0.02085	-0.03926	-0.14587	-0.38433	-0.35238	-0.16698	-0.12581	-0.04233	-0.16295
	201	0.18982	-0.03272	0.11091	0.03226	-0.43418	0.34384	-0.30062	-0.12811	-0.40217	-0.20699	-0.47363	-0.59939
	200	0.01335	0.04441	0.05485	-0.07308	0.46756	0.05703	-0.02426	-0.21542	0.0196	-0.15046	-0.30387	-0.50631
