# Supplementary material for: Discovery of the 1-naphthylamine biodegradation pathway reveals a broad-substrate-spectrum enzyme catalyzing 1-naphthylamine glutamylation
Source: eLife journal article supplement (doi:10.7554/elife.95555), 2024-07-26
Supplement: fig3-figsupp1-data1 [file Figure_3-figure_supplement_1-source_data_1.xlsx]

## Sheet: Figure_3─figure_supplement_1. 
	Figure_3─figure_supplement_1.
		Relative activity (%)
	pH	Y1	Y2	Y3	Y	STDEV
	4	0	0	0	0	0
	5	0	0	0	0	0
	6	2.3	4.72	7.03	4.68333	2.36521
	6	1.74	0.92	1.19	1.28333	0.417892
	7	4.61	5.92	7.32	5.95	1.35525
	8	99.48	89.17	111.76	100.137	11.3093
	9	92.56	93.57	110.87	99	10.2921
	9	87.62	105.42	90.33	94.4567	9.59073
	10	86.72	75.8	80.3	80.94	5.48806
	11	6.96	3.45	5.19	5.2	1.75502
		Relative activity (%)
	Temp (C˚)	Y1	Y2	Y3	Y	STDEV
	4	0.79	0.52	1.17	0.826667	0.326548
	20	9.62	5.04	7.03	7.23	2.29654
	30	9.21	7.53	12.94	9.89333	2.76898
	40	23.3	18.16	25.61	22.3567	3.81353
	50	49.02	44.91	53.77	49.2333	4.43385
	60	112.83	88.82	99.7	100.45	12.0226
	70	31.98	26.75	36.91	31.88	5.08074
	80	1.2	2.54	1.92	1.88667	0.670622
	The optimal pH (A) and temperature (B) of wild type NpaA1 activity. The optimal pH was determined at 25˚C using Bis -Tris buffer for pH 4-6, Tris buffer for pH 6-9, and glycine-NaOH buffer for 9-11. The activity of NpaA1 was measured in a range from 5-80˚C at pH 8.0 (50 mM Tris-HCl buffer). Error bars represent the standard deviation of three biological replicates.
