# Supplementary material for: Discovery of the 1-naphthylamine biodegradation pathway reveals a broad-substrate-spectrum enzyme catalyzing 1-naphthylamine glutamylation
Source: eLife journal article supplement (doi:10.7554/elife.95555), 2024-07-26
Supplement: fig4-figsupp1-data1 [file Figure_4-figure_supplement_1-source_data_1.xlsx]

## Sheet: Figure_4─figure_supplement_1
	Figure_4─figure_supplement_1A. Gel filstration of NpaA1.
		mAU
	Elution volume (mL)	Standards	NpaA1	LogMw
	-1.06812e-06	0.9	1.982	--
	0.0139993	0.9	1.98	--
	0.0279996	0.9	1.974	--
	0.0419999	0.9	1.963	--
	0.0560002	0.9	1.96	--
	0.0700005	0.9	1.961	--
	0.0840009	0.908	1.969	--
	0.0980012	0.917	1.969	--
	0.111999	0.913	1.97	--
	0.125999	0.908	1.964	--
	0.139999	0.901	1.96	--
	0.154	0.897	1.96	--
	0.168	0.89	1.966	--
	0.182	0.889	1.961	--
	0.196001	0.883	1.954	--
	0.210001	0.903	1.954	--
	0.223999	0.936	1.96	--
	0.237999	0.962	1.96	--
	0.251999	0.965	1.96	--
	0.266	0.945	1.953	--
	0.28	0.945	1.952	--
	0.294	0.95	1.96	--
	0.308001	0.95	1.968	--
	0.322001	0.95	1.97	--
	0.336001	0.941	1.97	--
	0.349999	0.935	1.968	--
	0.363999	0.94	1.951	--
	0.378	0.937	1.946	--
	0.392	0.93	1.95	--
	0.406	0.93	1.95	--
	0.420001	0.93	1.958	--
	0.434001	0.922	1.957	--
	0.448001	0.92	1.95	--
	0.461999	0.92	1.95	--
	0.475999	0.912	1.95	--
	0.489999	0.909	1.953	--
	0.504	0.9	1.96	--
	0.518	0.9	1.96	--
	0.532	0.9	1.96	--
	0.546001	0.9	1.963	--
	0.560001	0.9	1.96	--
	0.573999	0.904	1.964	--
	0.587999	0.909	1.97	--
	0.601999	0.9	1.963	--
	0.616	0.897	1.96	--
	0.63	0.89	1.951	--
	0.644	0.89	1.953	--
	0.658001	0.89	1.96	--
	0.672001	0.889	1.963	--
	0.686001	0.889	1.963	--
	0.699999	0.89	1.952	--
	0.713999	0.89	1.96	--
	0.728	0.882	1.963	--
	0.742	0.89	1.962	--
	0.756	0.884	1.962	--
	0.770001	0.88	1.97	--
	0.784001	0.88	1.97	--
	0.798001	0.88	1.97	--
	0.811999	0.88	1.97	--
	0.825999	0.88	1.97	--
	0.839999	0.88	1.959	--
	0.854	0.88	1.95	--
	0.868	0.88	1.95	--
	0.882	0.88	1.95	--
	0.896001	0.88	1.949	--
	0.910001	0.878	1.94	--
	0.923999	0.879	1.948	--
	0.937999	0.87	1.95	--
	0.951999	0.87	1.95	--
	0.966	0.876	1.95	--
	0.98	0.88	1.951	--
	0.994	0.878	1.96	--
	1.008	0.87	1.96	--
	1.022	0.879	1.96	--
	1.036	0.881	1.96	--
	1.05	0.874	1.956	--
	1.064	0.87	1.96	--
	1.078	0.873	1.962	--
	1.092	0.87	1.97	--
	1.106	0.869	1.979	--
	1.12	0.86	1.964	--
	1.134	0.86	1.969	--
	1.148	0.852	1.97	--
	1.162	0.859	1.97	--
	1.176	0.852	1.962	--
	1.19	0.849	1.96	--
	1.204	0.851	1.96	--
	1.218	0.865	1.953	--
	1.232	0.87	1.958	--
	1.246	0.861	1.96	--
	1.26	0.86	1.954	--
	1.274	0.86	1.95	--
	1.288	0.864	1.941	--
	1.302	0.87	1.94	--
	1.316	0.861	1.94	--
	1.33	0.862	1.931	--
	1.344	0.86	1.938	--
	1.358	0.86	1.94	--
	1.372	0.86	1.938	--
	1.386	0.861	1.94	--
	1.4	0.869	1.941	--
	1.414	0.86	1.95	--
	1.428	0.86	1.941	--
	1.442	0.86	1.934	--
	1.456	0.861	1.93	--
	1.47	0.87	1.93	--
	1.484	0.863	1.924	--
	1.498	0.86	1.92	--
	1.512	0.86	1.921	--
	1.526	0.86	1.936	--
	1.54	0.859	1.94	--
	1.554	0.86	1.939	--
	1.568	0.86	1.929	--
	1.582	0.86	1.917	--
	1.596	0.86	1.916	--
	1.61	0.86	1.924	--
	1.624	0.861	1.93	--
	1.638	0.87	1.93	--
	1.652	0.87	1.93	--
	1.666	0.87	1.924	--
	1.68	0.87	1.93	--
	1.694	0.87	1.93	--
	1.708	0.879	1.929	--
	1.722	0.88	1.92	--
	1.736	0.88	1.92	--
	1.75	0.871	1.92	--
	1.764	0.87	1.92	--
	1.778	0.87	1.92	--
	1.792	0.87	1.92	--
	1.806	0.864	1.92	--
	1.82	0.867	1.92	--
	1.834	0.87	1.92	--
	1.848	0.873	1.92	--
	1.862	0.879	1.92	--
	1.876	0.864	1.92	--
	1.89	0.86	1.911	--
	1.904	0.86	1.916	--
	1.918	0.852	1.92	--
	1.932	0.85	1.879	--
	1.946	0.846	1.783	--
	1.96	0.84	1.784	--
	1.974	0.84	1.791	--
	1.988	0.84	1.736	--
	2.002	0.846	1.848	--
	2.016	0.85	1.898	--
	2.03	0.849	1.941	--
	2.044	0.84	1.955	--
	2.058	0.84	1.96	--
	2.072	0.831	1.959	--
	2.086	0.829	1.954	--
	2.1	0.82	1.96	--
	2.114	0.82	1.964	--
	2.128	0.82	1.969	--
	2.142	0.828	1.971	--
	2.156	0.822	1.977	--
	2.17	0.811	1.97	--
	2.184	0.81	1.972	--
	2.198	0.81	1.977	--
	2.212	0.819	1.978	--
	2.226	0.816	1.954	--
	2.24	0.813	1.961	--
	2.254	0.822	1.97	--
	2.268	0.825	1.979	--
	2.282	0.82	1.98	--
	2.296	0.82	1.98	--
	2.31	0.82	1.972	--
	2.324	0.829	1.96	--
	2.338	0.83	1.969	--
	2.352	0.823	1.964	--
	2.366	0.827	1.954	--
	2.38	0.83	1.96	--
	2.394	0.836	1.96	--
	2.408	0.824	1.96	--
	2.422	0.82	1.958	--
	2.436	0.826	1.95	--
	2.45	0.83	1.95	--
	2.464	0.822	1.95	--
	2.478	0.82	1.943	--
	2.492	0.829	1.949	--
	2.506	0.83	1.95	--
	2.52	0.829	1.95	--
	2.534	0.821	1.95	--
	2.548	0.828	1.946	--
	2.562	0.824	1.942	--
	2.576	0.83	1.958	--
	2.59	0.834	1.952	--
	2.604	0.84	1.959	--
	2.618	0.831	1.963	--
	2.632	0.829	1.96	--
	2.646	0.833	1.96	--
	2.66	0.84	1.959	--
	2.674	0.842	1.95	--
	2.688	0.852	1.944	--
	2.702	0.843	1.94	--
	2.716	0.839	1.937	--
	2.73	0.83	1.937	--
	2.744	0.83	1.94	--
	2.758	0.821	1.94	--
	2.772	0.82	1.94	--
	2.786	0.829	1.94	--
	2.8	0.83	1.932	--
	2.814	0.83	1.928	--
	2.828	0.831	1.93	--
	2.842	0.836	1.93	--
	2.856	0.84	1.93	--
	2.87	0.84	1.934	--
	2.884	0.84	1.94	--
	2.898	0.84	1.94	--
	2.912	0.837	1.933	--
	2.926	0.836	1.929	--
	2.94	0.84	1.92	--
	2.954	0.84	1.929	--
	2.968	0.84	1.93	--
	2.982	0.831	1.921	--
	2.996	0.837	1.921	--
	3.01	0.831	1.929	--
	3.024	0.83	1.93	--
	3.038	0.83	1.93	--
	3.052	0.83	1.921	--
	3.066	0.83	1.92	--
	3.08	0.827	1.904	--
	3.094	0.828	1.845	--
	3.108	0.83	1.89	--
	3.122	0.83	1.927	--
	3.136	0.83	1.938	--
	3.15	0.83	1.947	--
	3.164	0.833	1.951	--
	3.178	0.835	1.966	--
	3.192	0.827	1.97	--
	3.206	0.822	1.968	--
	3.22	0.82	1.951	--
	3.234	0.829	1.949	--
	3.248	0.83	1.95	--
	3.262	0.828	1.95	--
	3.276	0.829	1.958	--
	3.29	0.823	1.96	--
	3.304	0.814	1.969	--
	3.318	0.811	1.981	--
	3.332	0.81	1.98	--
	3.346	0.81	1.98	--
	3.36	0.81	1.979	--
	3.374	0.811	1.97	--
	3.388	0.819	1.961	--
	3.402	0.813	1.952	--
	3.416	0.819	1.951	--
	3.43	0.813	1.959	--
	3.444	0.81	1.96	--
	3.458	0.81	1.954	--
	3.472	0.81	1.942	--
	3.486	0.81	1.93	--
	3.5	0.802	1.921	--
	3.514	0.808	1.922	--
	3.528	0.81	1.929	--
	3.542	0.817	1.921	--
	3.556	0.82	1.938	--
	3.57	0.82	1.956	--
	3.584	0.826	1.976	--
	3.598	0.83	1.997	--
	3.612	0.83	1.99	--
	3.626	0.839	1.974	--
	3.64	0.833	1.962	--
	3.654	0.82	1.949	--
	3.668	0.825	1.94	--
	3.682	0.822	1.931	--
	3.696	0.83	1.928	--
	3.71	0.838	1.924	--
	3.724	0.836	1.939	--
	3.738	0.825	1.941	--
	3.752	0.817	1.949	--
	3.766	0.812	1.948	--
	3.78	0.814	1.954	--
	3.794	0.828	1.964	--
	3.808	0.838	1.979	--
	3.822	0.839	1.98	--
	3.836	0.841	1.98	--
	3.85	0.835	1.982	--
	3.864	0.831	1.99	--
	3.878	0.84	1.983	--
	3.892	0.849	1.98	--
	3.906	0.842	1.971	--
	3.92	0.84	1.962	--
	3.934	0.832	1.969	--
	3.948	0.824	1.96	--
	3.962	0.82	1.955	--
	3.976	0.82	1.95	--
	3.99	0.82	1.95	--
	4.004	0.82	1.949	--
	4.018	0.82	1.937	--
	4.032	0.827	1.93	--
	4.046	0.83	1.93	--
	4.06	0.83	1.921	--
	4.074	0.821	1.92	--
	4.088	0.82	1.924	--
	4.102	0.816	1.925	--
	4.116	0.815	1.92	--
	4.13	0.821	1.92	--
	4.144	0.83	1.92	--
	4.158	0.83	1.921	--
	4.172	0.833	1.915	--
	4.186	0.837	1.909	--
	4.2	0.831	1.911	--
	4.214	0.839	1.903	--
	4.228	0.832	1.9	--
	4.242	0.83	1.9	--
	4.256	0.83	1.893	--
	4.27	0.83	1.893	--
	4.284	0.826	1.899	--
	4.298	0.819	1.894	--
	4.312	0.811	1.9	--
	4.326	0.803	1.891	--
	4.34	0.8	1.891	--
	4.354	0.807	1.904	--
	4.368	0.81	1.902	--
	4.382	0.803	1.9	--
	4.396	0.8	1.9	--
	4.41	0.803	1.9	--
	4.424	0.807	1.894	--
	4.438	0.811	1.89	--
	4.452	0.82	1.89	--
	4.466	0.82	1.89	--
	4.48	0.816	1.89	--
	4.494	0.81	1.898	--
	4.508	0.819	1.897	--
	4.522	0.82	1.9	--
	4.536	0.82	1.911	--
	4.55	0.82	1.92	--
	4.564	0.82	1.908	--
	4.578	0.82	1.9	--
	4.592	0.82	1.9	--
	4.606	0.828	1.9	--
	4.62	0.827	1.9	--
	4.634	0.83	1.9	--
	4.648	0.827	1.9	--
	4.662	0.83	1.901	--
	4.676	0.83	1.908	--
	4.69	0.829	1.9	--
	4.704	0.82	1.9	--
	4.718	0.829	1.9	--
	4.732	0.823	1.899	--
	4.746	0.82	1.89	--
	4.76	0.82	1.89	--
	4.774	0.828	1.89	--
	4.788	0.83	1.899	--
	4.802	0.83	1.9	--
	4.816	0.821	1.893	--
	4.83	0.827	1.89	--
	4.844	0.83	1.891	--
	4.858	0.83	1.9	--
	4.872	0.83	1.9	--
	4.886	0.839	1.912	--
	4.9	0.838	1.92	--
	4.914	0.823	1.923	--
	4.928	0.811	1.93	--
	4.942	0.81	1.93	--
	4.956	0.825	1.93	--
	4.97	0.837	1.922	--
	4.984	0.816	1.928	--
	4.998	0.806	1.929	--
	5.012	0.819	1.94	--
	5.026	0.82	1.94	--
	5.04	0.82	1.94	--
	5.054	0.82	1.947	--
	5.068	0.818	1.939	--
	5.082	0.812	1.93	--
	5.096	0.82	1.93	--
	5.11	0.812	1.928	--
	5.124	0.81	1.918	--
	5.138	0.81	1.92	--
	5.152	0.813	1.918	--
	5.166	0.82	1.91	--
	5.18	0.82	1.929	--
	5.194	0.811	1.94	--
	5.208	0.81	1.932	--
	5.222	0.819	1.93	--
	5.236	0.816	1.939	--
	5.25	0.816	1.936	--
	5.264	0.822	1.937	--
	5.278	0.822	1.934	--
	5.292	0.82	1.93	--
	5.306	0.811	1.934	--
	5.32	0.81	1.94	--
	5.334	0.811	1.94	--
	5.348	0.82	1.932	--
	5.362	0.811	1.93	--
	5.376	0.81	1.93	--
	5.39	0.803	1.93	--
	5.404	0.808	1.932	--
	5.418	0.8	1.93	--
	5.432	0.8	1.93	--
	5.446	0.8	1.931	--
	5.46	0.8	1.936	--
	5.474	0.805	1.928	--
	5.488	0.8	1.93	--
	5.502	0.797	1.93	--
	5.516	0.79	1.924	--
	5.53	0.79	1.918	--
	5.544	0.787	1.91	--
	5.558	0.78	1.919	--
	5.572	0.787	1.92	--
	5.586	0.789	1.914	--
	5.6	0.789	1.91	--
	5.614	0.79	1.91	--
	5.628	0.79	1.91	--
	5.642	0.79	1.91	--
	5.656	0.79	1.91	--
	5.67	0.799	1.909	--
	5.684	0.792	1.9	--
	5.698	0.79	1.9	--
	5.712	0.79	1.904	--
	5.726	0.79	1.91	--
	5.74	0.79	1.91	--
	5.754	0.799	1.908	--
	5.768	0.797	1.9	--
	5.782	0.79	1.9	--
	5.796	0.79	1.899	--
	5.81	0.781	1.895	--
	5.824	0.775	1.897	--
	5.838	0.787	1.899	--
	5.852	0.797	1.917	--
	5.866	0.792	1.989	--
	5.88	0.79	2.138	--
	5.894	0.79	2.306	--
	5.908	0.79	2.408	--
	5.922	0.781	2.304	--
	5.936	0.79	2.126	--
	5.95	0.79	2.028	--
	5.964	0.791	1.966	--
	5.978	0.794	1.899	--
	5.992	0.79	1.885	--
	6.006	0.789	1.907	--
	6.02	0.784	1.91	--
	6.034	0.79	1.907	--
	6.048	0.79	1.909	--
	6.062	0.79	1.913	--
	6.076	0.79	1.929	--
	6.09	0.79	1.955	--
	6.104	0.788	1.981	--
	6.118	0.79	1.986	--
	6.132	0.782	1.977	--
	6.146	0.78	1.961	--
	6.16	0.787	1.952	--
	6.174	0.79	1.938	--
	6.188	0.786	1.93	--
	6.202	0.78	1.929	--
	6.216	0.78	1.92	--
	6.23	0.785	1.918	--
	6.244	0.79	1.901	--
	6.258	0.79	1.891	--
	6.272	0.791	1.89	--
	6.286	0.807	1.89	--
	6.3	0.805	1.889	--
	6.314	0.809	1.88	--
	6.328	0.81	1.88	--
	6.342	0.81	1.88	--
	6.356	0.81	1.878	--
	6.37	0.809	1.879	--
	6.384	0.8	1.882	--
	6.398	0.8	1.89	--
	6.412	0.8	1.899	--
	6.426	0.8	1.891	--
	6.44	0.796	1.89	--
	6.454	0.798	1.89	--
	6.468	0.8	1.89	--
	6.482	0.8	1.896	--
	6.496	0.799	1.902	--
	6.51	0.79	1.91	--
	6.524	0.79	1.91	--
	6.538	0.79	1.903	--
	6.552	0.795	1.9	--
	6.566	0.79	1.9	--
	6.58	0.79	1.9	--
	6.594	0.79	1.896	--
	6.608	0.789	1.897	--
	6.622	0.78	1.888	--
	6.636	0.78	1.889	--
	6.65	0.786	1.89	--
	6.664	0.788	1.882	--
	6.678	0.783	1.881	--
	6.692	0.782	1.89	--
	6.706	0.79	1.887	--
	6.72	0.79	1.88	--
	6.734	0.782	1.88	--
	6.748	0.78	1.888	--
	6.762	0.778	1.882	--
	6.776	0.78	1.885	--
	6.79	0.78	1.89	--
	6.804	0.776	1.881	--
	6.818	0.777	1.874	--
	6.832	0.78	1.87	--
	6.846	0.78	1.87	--
	6.86	0.78	1.87	--
	6.874	0.789	1.879	--
	6.888	0.783	1.88	--
	6.902	0.78	1.88	--
	6.916	0.78	1.878	--
	6.93	0.78	1.875	--
	6.944	0.78	1.87	--
	6.958	0.765	1.851	--
	6.972	0.76	1.858	--
	6.986	0.76	1.861	--
	7	0.76	1.856	--
	7.014	0.76	1.85	--
	7.028	0.76	1.85	--
	7.042	0.76	1.85	--
	7.056	0.76	1.856	--
	7.07	0.769	1.869	--
	7.084	0.761	1.861	--
	7.098	0.76	1.857	--
	7.112	0.76	1.832	--
	7.126	0.754	1.839	--
	7.14	0.757	1.844	--
	7.154	0.759	1.85	--
	7.168	0.75	1.85	--
	7.182	0.74	1.84	--
	7.196	0.746	1.83	--
	7.21	0.762	1.829	--
	7.224	0.77	1.83	--
	7.238	0.761	1.821	--
	7.252	0.769	1.824	--
	7.266	0.77	1.83	--
	7.28	0.77	1.83	--
	7.294	0.767	1.83	--
	7.308	0.76	1.833	--
	7.322	0.767	1.834	--
	7.336	0.766	1.83	--
	7.35	0.763	1.839	--
	7.364	0.77	1.847	--
	7.378	0.768	1.85	--
	7.392	0.765	1.842	--
	7.406	0.77	1.84	--
	7.42	0.77	1.848	--
	7.434	0.779	1.842	--
	7.448	0.78	1.839	--
	7.462	0.78	1.83	--
	7.476	0.78	1.833	--
	7.49	0.78	1.836	--
	7.504	0.792	1.83	--
	7.518	0.794	1.83	--
	7.532	0.796	1.835	--
	7.546	0.809	1.84	--
	7.56	0.82	1.826	--
	7.574	0.833	1.82	--
	7.588	0.857	1.821	--
	7.602	0.882	1.829	--
	7.616	0.912	1.833	--
	7.63	0.946	1.825	--
	7.644	0.974	1.826	--
	7.658	1.014	1.83	--
	7.672	1.056	1.826	--
	7.686	1.119	1.83	--
	7.7	1.176	1.833	--
	7.714	1.243	1.839	--
	7.728	1.313	1.84	--
	7.742	1.393	1.84	--
	7.756	1.483	1.837	--
	7.77	1.577	1.831	--
	7.784	1.678	1.825	--
	7.798	1.792	1.829	--
	7.812	1.909	1.83	--
	7.826	2.033	1.823	--
	7.84	2.163	1.82	--
	7.854	2.293	1.832	--
	7.868	2.449	1.84	--
	7.882	2.613	1.84	--
	7.896	2.79	1.838	--
	7.91	2.948	1.83	--
	7.924	3.128	1.83	--
	7.938	3.309	1.822	--
	7.952	3.494	1.824	--
	7.966	3.691	1.823	--
	7.98	3.901	1.82	--
	7.994	4.114	1.829	--
	8.008	4.34	1.828	--
	8.022	4.563	1.83	--
	8.036	4.77	1.83	--
	8.05	4.993	1.83	--
	8.064	5.225	1.83	--
	8.078	5.461	1.843	--
	8.092	5.69	1.85	--
	8.106	5.921	1.843	--
	8.12	6.181	1.84	--
	8.134	6.427	1.831	--
	8.148	6.672	1.83	--
	8.162	6.916	1.83	--
	8.176	7.143	1.83	--
	8.19	7.358	1.823	--
	8.204	7.584	1.818	--
	8.218	7.804	1.82	--
	8.232	8.025	1.827	--
	8.246	8.248	1.827	--
	8.26	8.474	1.829	--
	8.274	8.67	1.826	--
	8.288	8.843	1.82	--
	8.302	9.035	1.82	--
	8.316	9.215	1.812	--
	8.33	9.366	1.818	--
	8.344	9.516	1.812	--
	8.358	9.667	1.818	--
	8.372	9.81	1.82	--
	8.386	9.94	1.82	--
	8.4	10.048	1.812	--
	8.414	10.146	1.801	--
	8.428	10.233	1.801	--
	8.442	10.298	1.817	--
	8.456	10.354	1.82	--
	8.47	10.415	1.82	--
	8.484	10.475	1.82	--
	8.498	10.524	1.82	--
	8.512	10.554	1.818	--
	8.526	10.561	1.818	--
	8.54	10.574	1.816	--
	8.554	10.578	1.812	--
	8.568	10.564	1.82	--
	8.582	10.538	1.813	--
	8.596	10.512	1.819	--
	8.61	10.5	1.82	--
	8.624	10.483	1.822	--
	8.638	10.451	1.828	--
	8.652	10.403	1.82	--
	8.666	10.38	1.82	--
	8.68	10.348	1.82	--
	8.694	10.313	1.822	--
	8.708	10.291	1.83	--
	8.722	10.297	1.822	--
	8.736	10.312	1.818	--
	8.75	10.35	1.818	--
	8.764	10.416	1.819	--
	8.778	10.514	1.82	--
	8.792	10.659	1.811	--
	8.806	10.838	1.802	--
	8.82	11.076	1.791	--
	8.834	11.405	1.799	--
	8.848	11.848	1.794	--
	8.862	12.428	1.795	--
	8.876	13.099	1.807	--
	8.89	13.911	1.81	--
	8.904	14.898	1.81	--
	8.918	16.056	1.81	--
	8.932	17.42	1.81	--
	8.946	19.003	1.81	--
	8.96	20.799	1.81	--
	8.974	22.912	1.81	--
	8.988	25.286	1.81	--
	9.002	27.759	1.805	--
	9.016	30.379	1.808	--
	9.03	33.2	1.8	--
	9.044	36.091	1.8	--
	9.058	39.113	1.8	--
	9.072	42.19	1.801	--
	9.086	45.338	1.804	--
	9.1	48.612	1.8	--
	9.114	51.878	1.8	--
	9.128	55.073	1.8	--
	9.142	58.232	1.809	--
	9.156	61.447	1.805	--
	9.17	64.62	1.809	--
	9.184	68.012	1.819	--
	9.198	71.567	1.824	--
	9.212	75.399	1.812	--
	9.226	79.673	1.827	--
	9.24	84.264	1.83	--
	9.254	89.155	1.823	--
	9.268	94.516	1.829	--
	9.282	100.475	1.83	--
	9.296	106.851	1.83	--
	9.31	113.927	1.822	--
	9.324	121.648	1.82	--
	9.338	130.195	1.822	--
	9.352	139.623	1.829	--
	9.366	149.403	1.827	--
	9.38	159.478	1.819	--
	9.394	169.954	1.82	--
	9.408	180.763	1.827	--
	9.422	191.702	1.827	--
	9.436	202.945	1.82	--
	9.45	214.075	1.814	--
	9.464	225.371	1.82	--
	9.478	236.698	1.82	--
	9.492	247.399	1.819	--
	9.506	257.368	1.811	--
	9.52	266.873	1.819	--
	9.534	275.775	1.814	--
	9.548	283.968	1.811	--
	9.562	291.701	1.818	--
	9.576	298.799	1.823	--
	9.59	305.414	1.813	--
	9.604	311.331	1.81	--
	9.618	316.448	1.81	--
	9.632	320.781	1.81	--
	9.646	324.595	1.796	--
	9.66	327.767	1.79	--
	9.674	330.489	1.791	2.82607
	9.688	333.163	1.794	--
	9.702	335.582	1.8	--
	9.716	337.783	1.8	--
	9.73	339.601	1.8	--
	9.744	340.952	1.792	--
	9.758	341.764	1.791	--
	9.772	342.172	1.795	--
	9.786	342.042	1.79	--
	9.8	341.289	1.781	--
	9.814	340.101	1.78	--
	9.828	338.349	1.788	--
	9.842	335.861	1.79	--
	9.856	332.449	1.79	--
	9.87	328.099	1.79	--
	9.884	322.809	1.79	--
	9.898	316.735	1.79	--
	9.912	309.792	1.79	--
	9.926	301.788	1.79	--
	9.94	293.148	1.793	--
	9.954	283.744	1.797	--
	9.968	273.531	1.79	--
	9.982	262.832	1.79	--
	9.996	251.843	1.781	--
	10.01	240.561	1.78	--
	10.024	229.347	1.78	--
	10.038	218.253	1.78	--
	10.052	206.902	1.783	--
	10.066	195.866	1.79	--
	10.08	185.205	1.79	--
	10.094	175.016	1.784	--
	10.108	165.313	1.785	--
	10.122	156.24	1.78	--
	10.136	147.763	1.787	--
	10.15	140.154	1.785	--
	10.164	133.171	1.78	--
	10.178	126.39	1.785	--
	10.192	120.288	1.782	--
	10.206	114.904	1.782	--
	10.22	110.174	1.789	--
	10.234	106.007	1.79	--
	10.248	102.397	1.784	--
	10.262	99.238	1.782	--
	10.276	96.692	1.79	--
	10.29	94.626	1.79	--
	10.304	92.633	1.79	--
	10.318	90.907	1.788	--
	10.332	89.592	1.79	--
	10.346	88.693	1.798	--
	10.36	87.968	1.8	--
	10.374	87.384	1.8	--
	10.388	86.977	1.801	--
	10.402	86.856	1.808	--
	10.416	86.871	1.809	--
	10.43	86.75	1.81	--
	10.444	86.629	1.818	--
	10.458	86.612	1.824	--
	10.472	86.65	1.83	--
	10.486	86.683	1.829	--
	10.5	86.674	1.829	--
	10.514	86.652	1.83	--
	10.528	86.653	1.83	--
	10.542	86.67	1.83	--
	10.556	86.521	1.83	--
	10.57	86.231	1.83	--
	10.584	85.929	1.821	--
	10.598	85.567	1.818	--
	10.612	85.144	1.81	--
	10.626	84.601	1.816	--
	10.64	83.982	1.82	--
	10.654	83.333	1.82	--
	10.668	82.609	1.82	--
	10.682	81.744	1.811	--
	10.696	80.778	1.81	--
	10.71	79.727	1.816	--
	10.724	78.592	1.82	--
	10.738	77.364	1.82	--
	10.752	76.004	1.82	--
	10.766	74.578	1.82	--
	10.78	73.099	1.82	--
	10.794	71.544	1.828	--
	10.808	69.876	1.821	--
	10.822	68.131	1.815	--
	10.836	66.298	1.819	--
	10.85	64.426	1.827	--
	10.864	62.518	1.82	--
	10.878	60.558	1.82	--
	10.892	58.591	1.83	--
	10.906	56.614	1.839	--
	10.92	54.63	1.83	--
	10.934	52.628	1.823	--
	10.948	50.622	1.832	--
	10.962	48.664	1.834	--
	10.976	46.753	1.826	--
	10.99	44.895	1.82	--
	11.004	43.063	1.836	--
	11.018	41.378	1.83	--
	11.032	39.737	1.822	--
	11.046	38.126	1.83	--
	11.06	36.588	1.838	--
	11.074	35.15	1.84	--
	11.088	33.807	1.841	--
	11.102	32.541	1.858	--
	11.116	31.355	1.848	--
	11.13	30.262	1.854	--
	11.144	29.298	1.86	--
	11.158	28.373	1.86	--
	11.172	27.501	1.86	--
	11.186	26.688	1.869	--
	11.2	25.976	1.87	--
	11.214	25.341	1.87	--
	11.228	24.768	1.861	--
	11.242	24.241	1.869	--
	11.256	23.755	1.87	--
	11.27	23.381	1.87	--
	11.284	23.046	1.874	--
	11.298	22.712	1.873	--
	11.312	22.418	1.87	--
	11.326	22.197	1.874	--
	11.34	22.017	1.889	--
	11.354	21.869	1.899	--
	11.368	21.744	1.891	--
	11.382	21.669	1.89	--
	11.396	21.66	1.899	--
	11.41	21.653	1.898	--
	11.424	21.652	1.891	--
	11.438	21.702	1.9	--
	11.452	21.822	1.899	--
	11.466	21.958	1.89	--
	11.48	22.108	1.89	--
	11.494	22.284	1.9	--
	11.508	22.52	1.912	--
	11.522	22.803	1.918	--
	11.536	23.141	1.929	--
	11.55	23.491	1.928	--
	11.564	23.91	1.939	--
	11.578	24.408	1.949	--
	11.592	24.946	1.952	--
	11.606	25.512	1.971	--
	11.62	26.145	1.979	--
	11.634	26.866	1.977	--
	11.648	27.669	2	--
	11.662	28.537	2.015	--
	11.676	29.495	2.02	--
	11.69	30.607	2.034	--
	11.704	31.847	2.048	--
	11.718	33.146	2.065	--
	11.732	34.548	2.081	--
	11.746	36.103	2.101	--
	11.76	37.811	2.126	--
	11.774	39.698	2.156	--
	11.788	41.733	2.188	--
	11.802	43.961	2.207	--
	11.816	46.5	2.254	--
	11.83	49.27	2.289	--
	11.844	52.136	2.342	--
	11.858	55.196	2.412	--
	11.872	58.584	2.491	--
	11.886	62.207	2.608	--
	11.9	66.103	2.752	--
	11.914	70.232	2.941	--
	11.928	74.74	3.173	--
	11.942	79.71	3.48	--
	11.956	84.941	3.91	--
	11.97	90.299	4.477	--
	11.984	95.908	5.201	--
	11.998	101.888	6.105	--
	12.012	108.14	7.188	--
	12.026	114.75	8.455	--
	12.04	121.504	9.901	--
	12.054	128.687	11.471	--
	12.068	136.379	13.151	--
	12.082	144.179	14.905	--
	12.096	151.896	16.711	--
	12.11	159.782	18.52	--
	12.124	167.927	20.311	--
	12.138	176.14	22.078	--
	12.152	184.526	23.794	--
	12.166	192.872	25.448	--
	12.18	201.49	27.021	--
	12.194	210.269	28.49	--
	12.208	218.814	29.877	--
	12.222	227.049	31.214	--
	12.236	235.138	32.427	--
	12.25	243.03	33.54	--
	12.264	250.789	34.531	--
	12.278	258.408	35.402	--
	12.292	265.642	36.144	--
	12.306	272.825	36.783	--
	12.32	279.793	37.312	--
	12.334	286.175	37.734	--
	12.348	291.929	38.022	--
	12.362	297.337	38.185	--
	12.376	302.238	38.237	--
	12.39	306.676	38.169	--
	12.404	310.725	37.997	--
	12.418	314.284	37.714	--
	12.432	317.469	37.321	--
	12.439	318.5	37	2.19866
	12.446	320.026	36.855	--
	12.46	321.959	36.287	--
	12.474	323.254	35.635	--
	12.488	324.019	34.934	--
	12.502	324.105	34.17	--
	12.516	323.664	33.356	--
	12.53	322.854	32.507	--
	12.544	321.534	31.633	--
	12.558	319.661	30.733	--
	12.572	317.157	29.832	--
	12.586	314.235	28.94	--
	12.6	310.778	28.056	--
	12.614	306.883	27.197	--
	12.628	302.583	26.388	--
	12.642	297.79	25.628	--
	12.656	292.736	24.926	--
	12.67	287.36	24.27	--
	12.684	281.63	23.671	--
	12.698	275.531	23.14	--
	12.712	269.325	22.674	--
	12.726	262.914	22.252	--
	12.74	256.372	21.891	--
	12.754	249.667	21.582	--
	12.768	242.677	21.318	--
	12.782	235.756	21.103	--
	12.796	228.712	20.92	--
	12.81	221.602	20.782	--
	12.824	214.547	20.674	--
	12.838	207.649	20.595	--
	12.852	200.76	20.549	--
	12.866	194.09	20.54	--
	12.88	187.523	20.555	--
	12.894	180.855	20.6	--
	12.908	174.387	20.671	--
	12.922	168.083	20.768	--
	12.936	161.979	20.888	--
	12.95	156.045	21.047	--
	12.964	150.361	21.227	--
	12.978	144.88	21.439	--
	12.992	139.795	21.665	--
	13.006	134.805	21.937	--
	13.02	129.848	22.228	--
	13.034	125.138	22.554	--
	13.048	120.667	22.921	--
	13.062	116.453	23.305	--
	13.076	112.449	23.725	--
	13.09	108.665	24.17	--
	13.104	105.064	24.642	--
	13.118	101.868	25.137	--
	13.132	98.782	25.622	--
	13.146	95.734	26.148	--
	13.16	92.812	26.692	--
	13.174	90.152	27.257	--
	13.188	87.727	27.834	--
	13.202	85.403	28.454	--
	13.216	83.225	29.105	--
	13.23	81.202	29.805	--
	13.244	79.472	30.551	--
	13.258	77.762	31.369	--
	13.272	76.087	32.275	--
	13.286	74.503	33.308	--
	13.3	73.091	34.492	--
	13.314	71.775	35.858	--
	13.328	70.545	37.449	--
	13.342	69.367	39.27	--
	13.356	68.274	41.378	--
	13.37	67.332	43.831	--
	13.384	66.392	46.696	--
	13.398	65.421	49.991	--
	13.412	64.481	53.776	--
	13.426	63.642	58.075	--
	13.44	62.826	62.959	--
	13.454	62.026	68.471	--
	13.468	61.208	74.599	--
	13.482	60.442	81.388	--
	13.496	59.729	88.852	--
	13.51	58.975	96.98	--
	13.524	58.201	105.792	--
	13.538	57.399	115.293	--
	13.552	56.612	125.424	--
	13.566	55.831	136.127	--
	13.58	55.029	147.426	--
	13.594	54.192	159.169	--
	13.608	53.342	171.268	--
	13.622	52.52	183.7	--
	13.636	51.654	196.378	--
	13.65	50.748	209.146	--
	13.664	49.817	221.962	--
	13.678	48.869	234.727	--
	13.692	47.912	247.459	--
	13.706	46.927	260.017	--
	13.72	45.932	272.257	--
	13.734	44.93	284.148	--
	13.748	43.914	295.624	--
	13.762	42.876	306.644	--
	13.776	41.815	317.15	--
	13.79	40.737	327.169	--
	13.804	39.652	336.484	--
	13.818	38.588	345.242	--
	13.832	37.519	377.149	--
	13.846	36.45	377.149	--
	13.86	35.391	377.149	--
	13.874	34.35	377.149	--
	13.888	33.323	379.966	--
	13.902	32.281	385.194	--
	13.916	31.255	389.879	--
	13.93	30.259	394.062	--
	13.944	29.308	397.846	--
	13.958	28.357	401.14	--
	13.972	27.436	403.994	--
	13.986	26.574	406.402	--
	14	25.715	408.346	--
	14.014	24.884	409.796	--
	14.028	24.079	410.853	--
	14.042	23.314	411.501	--
	14.056	22.581	411.527	1.74036
	14.07	21.888	410.972	--
	14.084	21.217	409.797	--
	14.098	20.595	407.846	--
	14.112	20.02	404.989	--
	14.126	19.429	401.324	--
	14.14	18.872	396.757	--
	14.154	18.365	391.242	--
	14.168	17.893	384.671	--
	14.182	17.441	377.023	--
	14.196	17.018	368.329	--
	14.21	16.608	358.652	--
	14.224	16.243	347.98	--
	14.238	15.918	336.394	--
	14.252	15.583	323.999	--
	14.266	15.263	310.919	--
	14.28	14.971	297.341	--
	14.294	14.702	283.303	--
	14.308	14.448	268.934	--
	14.322	14.215	254.324	--
	14.336	13.975	239.665	--
	14.35	13.777	225.156	--
	14.364	13.6	210.91	--
	14.378	13.404	197.012	--
	14.392	13.216	183.668	--
	14.406	13.062	170.919	--
	14.42	12.916	158.844	--
	14.434	12.776	147.485	--
	14.448	12.652	136.824	--
	14.462	12.531	126.924	--
	14.476	12.438	117.781	--
	14.49	12.345	109.486	--
	14.504	12.26	101.955	--
	14.518	12.174	95.19	--
	14.532	12.117	89.087	--
	14.546	12.078	83.628	--
	14.56	12.043	78.755	--
	14.574	12.027	74.324	--
	14.588	12.022	70.383	--
	14.602	12.041	66.882	--
	14.616	12.072	63.746	--
	14.63	12.108	60.942	--
	14.644	12.17	58.459	--
	14.658	12.26	56.237	--
	14.672	12.377	54.266	--
	14.686	12.489	52.502	--
	14.7	12.624	50.854	--
	14.714	12.788	49.311	--
	14.728	12.977	47.898	--
	14.742	13.192	46.621	--
	14.756	13.443	45.454	--
	14.77	13.719	44.37	--
	14.784	14.043	43.342	--
	14.798	14.4	42.391	--
	14.812	14.763	41.491	--
	14.826	15.188	40.613	--
	14.84	15.668	39.793	--
	14.854	16.187	39.014	--
	14.868	16.761	38.271	--
	14.882	17.389	37.554	--
	14.896	18.114	36.881	--
	14.91	18.948	36.247	--
	14.924	19.833	35.663	--
	14.938	20.78	35.089	--
	14.952	21.82	34.539	--
	14.966	22.974	33.998	--
	14.98	24.245	33.483	--
	14.994	25.618	33.006	--
	15.008	27.13	32.553	--
	15.022	28.847	32.101	--
	15.036	30.756	31.682	--
	15.05	32.744	31.293	--
	15.064	34.847	30.929	--
	15.078	37.153	30.563	--
	15.092	39.662	30.213	--
	15.106	42.389	29.884	--
	15.12	45.235	29.584	--
	15.134	48.281	29.317	--
	15.148	51.7	29.059	--
	15.162	55.398	28.829	--
	15.176	59.083	28.634	--
	15.19	62.925	28.458	--
	15.204	67.071	28.292	--
	15.218	71.373	28.147	--
	15.232	75.906	28.047	--
	15.246	80.547	27.971	--
	15.26	85.409	27.92	--
	15.274	90.574	27.892	--
	15.288	95.929	27.893	--
	15.302	101.183	27.922	--
	15.316	106.437	27.974	--
	15.33	111.854	28.061	--
	15.344	117.364	28.182	--
	15.358	122.956	28.321	--
	15.372	128.402	28.493	--
	15.386	133.92	28.697	--
	15.4	139.616	28.914	--
	15.414	145.204	29.166	--
	15.428	150.442	29.449	--
	15.442	155.524	29.744	--
	15.456	160.525	30.045	--
	15.47	165.356	30.35	--
	15.484	170.084	30.677	--
	15.498	174.514	31.01	--
	15.512	178.776	31.359	--
	15.526	182.878	31.695	--
	15.54	186.676	32.041	--
	15.554	190.045	32.386	--
	15.568	193.033	32.735	--
	15.582	195.673	33.057	--
	15.589	197	33.1	1.64345
	15.596	198.004	33.386	--
	15.61	200.043	33.681	--
	15.624	201.589	33.971	--
	15.638	202.786	34.257	--
	15.652	203.555	34.529	--
	15.666	203.88	34.784	--
	15.68	203.716	35.026	--
	15.694	203.015	35.24	--
	15.708	201.815	35.428	--
	15.722	200.122	35.598	--
	15.736	198.052	35.749	--
	15.75	195.509	35.881	--
	15.764	192.377	35.992	--
	15.778	188.69	36.076	--
	15.792	184.753	36.156	--
	15.806	180.522	36.201	--
	15.82	175.866	36.223	--
	15.834	170.88	36.228	--
	15.848	165.569	36.21	--
	15.862	160.213	36.151	--
	15.876	154.623	36.077	--
	15.89	148.716	35.994	--
	15.904	142.694	35.891	--
	15.918	136.865	35.759	--
	15.932	131.088	35.601	--
	15.946	125.259	35.423	--
	15.96	119.634	35.204	--
	15.974	113.901	34.964	--
	15.988	108.378	34.715	--
	16.002	103.022	34.436	--
	16.016	97.845	34.138	--
	16.03	92.769	33.824	--
	16.044	88.025	33.509	--
	16.058	83.554	33.158	--
	16.072	79.336	32.791	--
	16.086	75.395	32.407	--
	16.1	71.479	32.006	--
	16.114	67.844	31.606	--
	16.128	64.415	31.197	--
	16.142	61.25	30.781	--
	16.156	58.244	30.355	--
	16.17	55.467	29.922	--
	16.184	52.847	29.496	--
	16.198	50.45	29.075	--
	16.212	48.295	28.657	--
	16.226	46.088	28.248	--
	16.24	43.972	27.855	--
	16.254	42.013	27.491	--
	16.268	40.244	27.119	--
	16.282	38.528	26.768	--
	16.296	36.881	26.436	--
	16.31	35.318	26.117	--
	16.324	33.905	25.824	--
	16.338	32.572	25.546	--
	16.352	31.222	25.275	--
	16.366	29.91	25.042	--
	16.38	28.649	24.819	--
	16.394	27.488	24.628	--
	16.408	26.36	24.469	--
	16.422	25.26	24.33	--
	16.436	24.181	24.187	--
	16.45	23.205	24.068	--
	16.464	22.272	23.964	--
	16.478	21.33	23.883	--
	16.492	20.403	23.832	--
	16.506	19.515	23.787	--
	16.52	18.667	23.753	--
	16.534	17.858	23.75	--
	16.548	17.072	23.756	--
	16.562	16.291	23.777	--
	16.576	15.58	23.808	--
	16.59	14.89	23.86	--
	16.604	14.229	23.92	--
	16.618	13.587	24.013	--
	16.632	12.967	24.126	--
	16.646	12.38	24.231	--
	16.66	11.832	24.359	--
	16.674	11.304	24.511	--
	16.688	10.798	24.659	--
	16.702	10.342	24.828	--
	16.716	9.901	25.013	--
	16.73	9.484	25.222	--
	16.744	9.082	25.455	--
	16.758	8.711	25.716	--
	16.772	8.364	25.994	--
	16.786	8.038	26.295	--
	16.8	7.725	26.624	--
	16.814	7.442	27.004	--
	16.828	7.192	27.399	--
	16.842	6.958	27.852	--
	16.856	6.728	28.36	--
	16.87	6.514	28.95	--
	16.884	6.327	29.627	--
	16.898	6.14	30.371	--
	16.912	5.972	31.233	--
	16.926	5.822	32.209	--
	16.94	5.673	33.321	--
	16.954	5.544	34.607	--
	16.968	5.423	36.064	--
	16.982	5.313	37.7	--
	16.996	5.203	39.581	--
	17.01	5.117	41.694	--
	17.024	5.032	44.063	--
	17.038	4.962	46.729	--
	17.052	4.888	49.692	--
	17.066	4.823	52.962	--
	17.08	4.78	56.553	--
	17.094	4.735	60.475	--
	17.108	4.705	64.714	--
	17.122	4.684	69.251	--
	17.136	4.68	74.05	--
	17.15	4.683	79.158	--
	17.164	4.697	84.517	--
	17.178	4.736	90.072	--
	17.192	4.796	95.846	--
	17.206	4.891	101.787	--
	17.22	5.009	107.821	--
	17.234	5.164	113.911	--
	17.248	5.372	120.008	--
	17.262	5.634	126.064	--
	17.276	5.957	132.091	--
	17.29	6.356	137.943	--
	17.304	6.864	143.586	--
	17.318	7.491	149.013	--
	17.332	8.247	154.202	--
	17.346	9.13	159.145	--
	17.36	10.222	163.826	--
	17.374	11.585	168.185	--
	17.388	13.184	172.242	--
	17.402	14.979	176.098	--
	17.416	17.05	179.656	--
	17.43	19.507	182.898	--
	17.444	22.353	185.877	--
	17.458	25.544	188.541	--
	17.472	29.056	190.918	--
	17.486	33.166	193.029	--
	17.5	38.044	194.915	--
	17.514	43.298	196.551	--
	17.528	48.787	197.948	--
	17.542	54.892	199.119	--
	17.556	61.724	200.059	--
	17.57	69.169	200.771	--
	17.584	76.994	201.244	--
	17.598	85.29	201.516	--
	17.612	94.425	201.553	--
	17.626	104.448	201.351	--
	17.64	114.802	200.894	--
	17.654	125.095	200.192	--
	17.668	135.825	199.222	--
	17.682	147.167	197.981	--
	17.696	159.156	196.468	--
	17.71	170.892	194.659	--
	17.724	182.461	192.545	--
	17.738	194.74	190.128	--
	17.752	207.738	187.397	--
	17.766	220.144	184.328	--
	17.78	231.858	180.938	--
	17.794	243.661	177.207	--
	17.808	255.36	173.172	--
	17.822	267.094	168.871	--
	17.836	278.241	164.287	--
	17.85	288.94	159.452	--
	17.864	299.489	154.366	--
	17.878	309.931	149.086	--
	17.892	319.592	143.591	--
	17.906	328.327	137.959	--
	17.92	336.569	132.23	--
	17.934	344.22	126.407	--
	17.948	351.637	120.533	--
	17.962	358.169	114.646	--
	17.976	363.951	108.805	--
	17.99	369.135	102.986	--
	18.004	373.709	97.222	--
	18.011	375.5	94	1.23045
	18.018	377.448	91.559	--
	18.032	380.223	86.008	--
	18.046	382.152	80.607	--
	18.06	383.126	75.442	--
	18.074	383.479	70.523	--
	18.088	383.009	65.851	--
	18.102	381.509	61.433	--
	18.116	378.799	57.267	--
	18.13	375.272	53.353	--
	18.144	371.147	49.653	--
	18.158	366.097	46.201	--
	18.172	359.924	42.996	--
	18.186	352.797	40.036	--
	18.2	345.24	37.298	--
	18.214	337.175	34.8	--
	18.228	328.057	32.507	--
	18.242	317.96	30.395	--
	18.256	307.655	28.477	--
	18.27	297.355	26.713	--
	18.284	286.576	25.077	--
	18.298	275.432	23.577	--
	18.312	263.937	22.207	--
	18.326	252.435	20.98	--
	18.34	241.012	19.839	--
	18.354	229.402	18.777	--
	18.368	217.639	17.823	--
	18.382	206.147	16.939	--
	18.396	195.208	16.108	--
	18.41	184.45	15.339	--
	18.424	174.09	14.618	--
	18.438	163.676	13.95	--
	18.452	153.773	13.329	--
	18.466	144.353	12.758	--
	18.48	135.201	12.229	--
	18.494	126.417	11.727	--
	18.508	118.083	11.266	--
	18.522	110.349	10.829	--
	18.536	102.957	10.404	--
	18.55	96.308	10.02	--
	18.564	89.764	9.654	--
	18.578	83.557	9.319	--
	18.592	77.783	9.011	--
	18.606	72.514	8.703	--
	18.62	67.575	8.423	--
	18.634	62.864	8.158	--
	18.648	58.516	7.9	--
	18.662	54.506	7.669	--
	18.676	50.985	7.451	--
	18.69	47.499	7.245	--
	18.704	44.215	7.053	--
	18.718	41.168	6.877	--
	18.732	38.415	6.712	--
	18.746	35.846	6.56	--
	18.76	33.426	6.404	--
	18.774	31.172	6.266	--
	18.788	29.103	6.128	--
	18.802	27.31	6.006	--
	18.816	25.542	5.892	--
	18.83	23.852	5.782	--
	18.844	22.284	5.682	--
	18.858	20.9	5.581	--
	18.872	19.598	5.491	--
	18.886	18.349	5.403	--
	18.9	17.188	5.326	--
	18.914	16.146	5.259	--
	18.928	15.22	5.188	--
	18.942	14.329	5.119	--
	18.956	13.471	5.06	--
	18.97	12.679	5.01	--
	18.984	11.974	4.949	--
	18.998	11.315	4.9	--
	19.012	10.679	4.846	--
	19.026	10.089	4.804	--
	19.04	9.565	4.77	--
	19.054	9.087	4.733	--
	19.068	8.626	4.699	--
	19.082	8.186	4.662	--
	19.096	7.787	4.623	--
	19.11	7.414	4.589	--
	19.124	7.06	4.571	--
	19.138	6.728	4.548	--
	19.152	6.421	4.527	--
	19.166	6.145	4.498	--
	19.18	5.881	4.48	--
	19.194	5.644	4.458	--
	19.208	5.412	4.433	--
	19.222	5.194	4.411	--
	19.236	4.999	4.393	--
	19.25	4.825	4.372	--
	19.264	4.641	4.359	--
	19.278	4.472	4.335	--
	19.292	4.323	4.327	--
	19.306	4.179	4.31	--
	19.32	4.052	4.297	--
	19.334	3.932	4.277	--
	19.348	3.813	4.265	--
	19.362	3.707	4.25	--
	19.376	3.609	4.23	--
	19.39	3.534	4.22	--
	19.404	3.444	4.212	--
	19.418	3.372	4.2	--
	19.432	3.309	4.189	--
	19.446	3.239	4.18	--
	19.46	3.182	4.171	--
	19.474	3.117	4.17	--
	19.488	3.056	4.161	--
	19.502	3.009	4.154	--
	19.516	2.962	4.148	--
	19.53	2.914	4.134	--
	19.544	2.876	4.121	--
	19.558	2.833	4.118	--
	19.572	2.806	4.105	--
	19.586	2.787	4.11	--
	19.6	2.754	4.116	--
	19.614	2.721	4.119	--
	19.628	2.69	4.11	--
	19.642	2.659	4.108	--
	19.656	2.633	4.101	--
	19.67	2.617	4.093	--
	19.684	2.603	4.089	--
	19.698	2.581	4.084	--
	19.712	2.563	4.088	--
	19.726	2.539	4.09	--
	19.74	2.521	4.09	--
	19.754	2.508	4.09	--
	19.768	2.494	4.087	--
	19.782	2.473	4.08	--
	19.796	2.46	4.08	--
	19.81	2.451	4.08	--
	19.824	2.443	4.08	--
	19.838	2.429	4.085	--
	19.852	2.415	4.08	--
	19.866	2.41	4.08	--
	19.88	2.401	4.08	--
	19.894	2.4	4.078	--
	19.908	2.392	4.064	--
	19.922	2.381	4.051	--
	19.936	2.38	4.052	--
	19.95	2.379	4.052	--
	19.964	2.372	4.046	--
	19.978	2.368	4.04	--
	19.992	2.36	4.043	--
	20.006	2.358	4.04	--
	20.02	2.35	4.048	--
	20.034	2.353	4.05	--
	20.048	2.367	4.041	--
	20.062	2.362	4.044	--
	20.076	2.367	4.05	--
	20.09	2.37	4.05	--
	20.104	2.37	4.048	--
	20.118	2.376	4.041	--
	20.132	2.38	4.04	--
	20.146	2.388	4.04	--
	20.16	2.399	4.033	--
	20.174	2.4	4.021	--
	20.188	2.4	4.011	--
	20.202	2.408	4.01	--
	20.216	2.41	4.004	--
	20.23	2.424	4.007	--
	20.244	2.439	4.01	--
	20.258	2.448	4.008	--
	20.272	2.467	3.997	--
	20.286	2.484	3.991	--
	20.3	2.5	4	--
	20.314	2.518	3.992	--
	20.328	2.524	3.998	--
	20.342	2.543	4	--
	20.356	2.57	4	--
	20.37	2.583	3.997	--
	20.384	2.606	3.99	--
	20.398	2.63	3.989	--
	20.412	2.653	3.981	--
	20.426	2.671	3.98	--
	20.44	2.687	3.98	--
	20.454	2.704	3.978	--
	20.468	2.721	3.966	--
	20.482	2.746	3.96	--
	20.496	2.771	3.972	--
	20.51	2.786	3.972	--
	20.524	2.806	3.97	--
	20.538	2.827	3.964	--
	20.552	2.856	3.96	--
	20.566	2.87	3.951	--
	20.58	2.888	3.95	--
	20.594	2.909	3.95	--
	20.608	2.932	3.958	--
	20.622	2.96	3.96	--
	20.636	2.99	3.952	--
	20.65	3.012	3.949	--
	20.664	3.032	3.947	--
	20.678	3.059	3.957	--
	20.692	3.098	3.96	--
	20.706	3.14	3.969	--
	20.72	3.17	3.973	--
	20.734	3.199	3.977	--
	20.748	3.243	3.979	--
	20.762	3.285	3.971	--
	20.776	3.335	3.967	--
	20.79	3.384	3.969	--
	20.804	3.434	3.964	--
	20.818	3.489	3.962	--
	20.832	3.555	3.96	--
	20.846	3.624	3.958	--
	20.86	3.695	3.95	--
	20.874	3.776	3.95	--
	20.888	3.864	3.95	--
	20.902	3.97	3.949	--
	20.916	4.104	3.947	--
	20.93	4.253	3.942	--
	20.944	4.435	3.945	--
	20.958	4.662	3.937	--
	20.972	4.931	3.937	--
	20.986	5.244	3.95	--
	21	5.646	3.95	--
	21.014	6.136	3.949	--
	21.028	6.73	3.938	--
	21.042	7.449	3.935	--
	21.056	8.315	3.922	--
	21.07	9.405	3.919	--
	21.084	10.764	3.906	--
	21.098	12.315	3.906	--
	21.112	14.103	3.917	--
	21.126	16.245	3.91	--
	21.14	18.782	3.913	--
	21.154	21.715	3.92	--
	21.168	24.983	3.913	--
	21.182	28.692	3.91	--
	21.196	33.069	3.91	--
	21.21	38.141	3.904	--
	21.224	43.493	3.9	--
	21.238	49.173	3.9	--
	21.252	55.607	3.899	--
	21.266	62.849	3.89	--
	21.28	70.581	3.884	--
	21.294	78.439	3.88	--
	21.308	86.955	3.88	--
	21.322	96.494	3.881	--
	21.336	106.776	3.88	--
	21.35	116.953	3.88	--
	21.364	127.391	3.884	--
	21.378	138.504	3.881	--
	21.392	150.145	3.871	--
	21.406	162.311	3.87	--
	21.42	174.289	3.862	--
	21.434	186.604	3.86	--
	21.448	199.744	3.87	--
	21.462	213.405	3.872	--
	21.476	226.299	3.86	--
	21.49	238.94	3.856	--
	21.504	251.865	3.867	--
	21.518	265.103	3.865	--
	21.532	278.199	3.859	--
	21.546	290.669	3.848	--
	21.56	303.205	3.84	--
	21.574	315.778	3.835	--
	21.588	328.198	3.822	--
	21.602	339.696	3.822	--
	21.616	350.659	3.82	--
	21.63	360.945	3.814	--
	21.644	370.97	3.794	--
	21.658	380.444	3.79	--
	21.672	388.817	3.789	--
	21.679	392	3.785	0.130334
	21.686	396.364	3.781
	21.7	403.135	3.778
	21.714	409.137	3.766
	21.728	413.885	3.756
	21.742	417.425	3.741
	21.756	419.593	3.732
	21.77	420.873	3.723
	21.784	421.077	3.717
	21.798	420.017	3.708
	21.812	417.455	3.696
	21.826	413.541	3.681
	21.84	408.994	3.664
	21.854	403.608	3.652
	21.868	397.117	3.637
	21.882	389.625	3.623
	21.896	381.422	3.613
	21.91	372.932	3.609
	21.924	363.948	3.593
	21.938	353.924	3.569
	21.952	343.352	3.56
	21.966	333.177	3.542
	21.98	323.015	3.539
	21.994	312.515	3.53
	22.008	302.052	3.522
	22.022	291.361	3.525
	22.036	280.851	3.509
	22.05	270.265	3.498
	22.064	259.814	3.49
	22.078	249.35	3.481
	22.092	239.068	3.48
	22.106	229.005	3.468
	22.12	219.394	3.451
	22.134	210.393	3.447
	22.148	200.972	3.437
	22.162	191.777	3.421
	22.176	182.916	3.41
	22.19	174.69	3.41
	22.204	166.343	3.405
	22.218	158.065	3.393
	22.232	150.148	3.382
	22.246	142.963	3.377
	22.26	136.316	3.365
	22.274	129.463	3.36
	22.288	122.807	3.359
	22.302	116.553	3.35
	22.316	111.181	3.35
	22.33	105.767	3.342
	22.344	100.349	3.349
	22.358	95.14	3.35
	22.372	90.898	3.354
	22.386	87.035	3.357
	22.4	82.287	3.35
	22.414	77.511	3.344
	22.428	73.184	3.34
	22.442	69.616	3.34
	22.456	65.46	3.341
	22.47	61.069	3.35
	22.484	56.904	3.353
	22.498	53.541	3.35
	22.512	50.333	3.352
	22.526	46.186	3.35
	22.54	41.876	3.365
	22.554	37.944	3.371
	22.568	34.682	3.385
	22.582	31.431	3.388
	22.596	28.061	3.396
	22.61	24.898	3.4
	22.624	22.289	3.408
	22.638	20.139	3.41
	22.652	18.108	3.416
	22.666	16.122	3.427
	22.68	14.351	3.43
	22.694	12.883	3.43
	22.708	11.643	3.433
	22.722	10.561	3.446
	22.736	9.637	3.45
	22.75	8.871	3.45
	22.764	8.227	3.45
	22.778	7.695	3.457
	22.792	7.236	3.464
	22.806	6.825	3.483
	22.82	6.484	3.49
	22.834	6.187	3.498
	22.848	5.925	3.523
	22.862	5.69	3.535
	22.876	5.48	3.547
	22.89	5.295	3.554
	22.904	5.125	3.561
	22.918	4.964	3.573
	22.932	4.816	3.58
	22.946	4.684	3.589
	22.96	4.571	3.599
	22.974	4.456	3.609
	22.988	4.358	3.619
	23.002	4.285	3.628
	23.016	4.219	3.644
	23.03	4.157	3.65
	23.044	4.114	3.665
	23.058	4.07	3.67
	23.072	4.047	3.679
	23.086	4.017	3.68
	23.1	3.987	3.688
	23.114	3.959	3.694
	23.128	3.936	3.7
	23.142	3.912	3.712
	23.156	3.888	3.73
	23.17	3.86	3.732
	23.184	3.832	3.734
	23.198	3.795	3.749
	23.212	3.756	3.76
	23.226	3.714	3.76
	23.24	3.657	3.777
	23.254	3.595	3.79
	23.268	3.532	3.79
	23.282	3.464	3.803
	23.296	3.383	3.815
	23.31	3.293	3.829
	23.324	3.204	3.83
	23.338	3.12	3.839
	23.352	3.027	3.84
	23.366	2.948	3.847
	23.38	2.866	3.85
	23.394	2.774	3.859
	23.408	2.691	3.864
	23.422	2.614	3.87
	23.436	2.547	3.871
	23.45	2.479	3.879
	23.464	2.41	3.88
	23.478	2.338	3.885
	23.492	2.269	3.871
	23.506	2.204	3.861
	23.52	2.151	3.86
	23.534	2.096	3.86
	23.548	2.054	3.86
	23.562	2.014	3.856
	23.576	1.992	3.85
	23.59	1.973	3.846
	23.604	1.961	3.84
	23.618	1.955	3.849
	23.632	1.94	3.847
	23.646	1.922	3.84
	23.66	1.901	3.84
	23.674	1.874	3.848
	23.688	1.861	3.85
	23.702	1.851	3.857
	23.716	1.842	3.86
	23.73	1.83	3.867
	23.744	1.816	3.86
	23.758	1.803	3.86
	23.772	1.793	3.862
	23.786	1.787	3.86
	23.8	1.773	3.86
	23.814	1.761	3.86
	23.828	1.759	3.86
	23.842	1.745	3.863
	23.856	1.738	3.87
	23.87	1.724	3.872
	23.884	1.709	3.87
	23.898	1.698	3.871
	23.912	1.682	3.889
	23.926	1.673	3.897
	23.94	1.668	3.91
	23.954	1.658	3.918
	23.968	1.644	3.907
	23.982	1.633	3.9
	23.996	1.624	3.905
	24.01	1.62	3.9
	24.024	1.611	3.9
	24.038	1.602	3.902
	24.052	1.59	3.901
	24.066	1.583	3.901
	24.08	1.567	3.907
	24.094	1.56	3.91
	24.108	1.56	3.905
	24.122	1.56	3.891
	24.136	1.551	3.881
	24.15	1.547	3.876
	24.164	1.539	3.88
	24.178	1.527	3.87
	24.192	1.523	3.857
	24.206	1.523	3.842
	24.22	1.52	3.831
	24.234	1.511	3.828
	24.248	1.51	3.811
	24.262	1.51	3.792
	24.276	1.503	3.781
	24.29	1.508	3.753
	24.304	1.51	3.736
	24.318	1.501	3.721
	24.332	1.492	3.716
	24.346	1.484	3.685
	24.36	1.48	3.661
	24.374	1.475	3.64
	24.388	1.47	3.619
	24.402	1.47	3.599
	24.416	1.47	3.577
	24.43	1.47	3.553
	24.444	1.47	3.519
	24.458	1.47	3.494
	24.472	1.473	3.477
	24.486	1.48	3.442
	24.5	1.471	3.417
	24.514	1.47	3.388
	24.528	1.479	3.353
	24.542	1.471	3.325
	24.556	1.462	3.291
	24.57	1.46	3.265
	24.584	1.46	3.243
	24.598	1.46	3.211
	24.612	1.46	3.191
	24.626	1.46	3.157
	24.64	1.452	3.132
	24.654	1.449	3.094
	24.668	1.44	3.081
	24.682	1.434	3.054
	24.696	1.436	3.031
	24.71	1.435	3.008
	24.724	1.435	2.991
	24.738	1.429	2.973
	24.752	1.42	2.952
	24.766	1.423	2.936
	24.78	1.422	2.918
	24.794	1.42	2.892
	24.808	1.415	2.881
	24.822	1.415	2.868
	24.836	1.413	2.847
	24.85	1.41	2.831
	24.864	1.402	2.82
	24.878	1.392	2.818
	24.892	1.388	2.808
	24.906	1.38	2.791
	24.92	1.374	2.779
	24.934	1.369	2.768
	24.948	1.355	2.759
	24.962	1.346	2.75
	24.976	1.348	2.748
	24.99	1.335	2.74
	25.004	1.33	2.739
	25.018	1.328	2.73
	25.032	1.32	2.73
	25.046	1.316	2.73
	25.06	1.309	2.73
	25.074	1.3	2.731
	25.088	1.299	2.731
	25.102	1.288	2.738
	25.116	1.274	2.74
	25.13	1.27	2.739
	25.144	1.261	2.735
	25.158	1.254	2.745
	25.172	1.25	2.743
	25.186	1.24	2.746
	25.2	1.231	2.757
	25.214	1.23	2.76
	25.228	1.229	2.761
	25.242	1.22	2.771
	25.256	1.22	2.78
	25.27	1.214	2.78
	25.284	1.204	2.78
	25.298	1.194	2.797
	25.312	1.189	2.809
	25.326	1.18	2.808
	25.34	1.175	2.81
	25.354	1.16	2.81
	25.368	1.153	2.812
	25.382	1.15	2.811
	25.396	1.15	2.81
	25.41	1.15	2.813
	25.424	1.15	2.81
	25.438	1.15	2.81
	25.452	1.147	2.801
	25.466	1.149	2.803
	25.48	1.15	2.802
	25.494	1.142	2.795
	25.508	1.142	2.781
	25.522	1.14	2.784
	25.536	1.134	2.789
	25.55	1.129	2.78
	25.564	1.12	2.78
	25.578	1.119	2.784
	25.592	1.11	2.78
	25.606	1.118	2.77
	25.62	1.12	2.76
	25.634	1.111	2.75
	25.648	1.11	2.74
	25.662	1.11	2.73
	25.676	1.11	2.73
	25.69	1.11	2.721
	25.704	1.108	2.702
	25.718	1.112	2.701
	25.732	1.12	2.691
	25.746	1.12	2.68
	25.76	1.128	2.669
	25.774	1.13	2.657
	25.788	1.13	2.646
	25.802	1.139	2.636
	25.816	1.14	2.621
	25.83	1.142	2.611
	25.844	1.153	2.604
	25.858	1.169	2.592
	25.872	1.17	2.581
	25.886	1.177	2.562
	25.9	1.191	2.551
	25.914	1.208	2.538
	25.928	1.228	2.529
	25.942	1.245	2.518
	25.956	1.262	2.505
	25.97	1.284	2.491
	25.984	1.315	2.49
	25.998	1.341	2.48
	26.012	1.37	2.462
	26.026	1.396	2.451
	26.04	1.425	2.441
	26.054	1.448	2.43
	26.068	1.483	2.417
	26.082	1.519	2.404
	26.096	1.557	2.393
	26.11	1.593	2.379
	26.124	1.63	2.369
	26.138	1.668	2.359
	26.152	1.71	2.353
	26.166	1.746	2.348
	26.18	1.788	2.332
	26.194	1.832	2.33
	26.208	1.872	2.33
	26.222	1.915	2.33
	26.236	1.952	2.321
	26.25	1.989	2.318
	26.264	2.037	2.294
	26.278	2.084	2.281
	26.292	2.128	2.272
	26.306	2.17	2.27
	26.32	2.21	2.266
	26.334	2.251	2.26
	26.348	2.298	2.261
	26.362	2.334	2.268
	26.376	2.372	2.26
	26.39	2.425	2.256
	26.404	2.467	2.25
	26.418	2.499	2.25
	26.432	2.521	2.241
	26.446	2.561	2.24
	26.46	2.596	2.24
	26.474	2.626	2.24
	26.488	2.652	2.24
	26.502	2.673	2.24
	26.516	2.693	2.235
	26.53	2.714	2.24
	26.544	2.741	2.242
	26.558	2.759	2.25
	26.572	2.768	2.25
	26.586	2.783	2.25
	26.6	2.79	2.25
	26.614	2.798	2.251
	26.628	2.803	2.26
	26.642	2.807	2.252
	26.656	2.8	2.248
	26.67	2.796	2.24
	26.684	2.79	2.24
	26.698	2.774	2.24
	26.712	2.753	2.239
	26.726	2.736	2.231
	26.74	2.722	2.23
	26.754	2.705	2.238
	26.768	2.686	2.23
	26.782	2.652	2.23
	26.796	2.625	2.23
	26.81	2.596	2.229
	26.824	2.566	2.23
	26.838	2.548	2.23
	26.852	2.514	2.237
	26.866	2.483	2.24
	26.88	2.45	2.24
	26.894	2.405	2.24
	26.908	2.375	2.24
	26.922	2.344	2.231
	26.936	2.299	2.222
	26.95	2.261	2.228
	26.964	2.216	2.222
	26.978	2.176	2.209
	26.992	2.14	2.2
	27.006	2.097	2.2
	27.02	2.054	2.207
	27.034	2.016	2.21
	27.048	1.967	2.21
	27.062	1.929	2.212
	27.076	1.896	2.22
	27.09	1.858	2.22
	27.104	1.822	2.214
	27.118	1.784	2.209
	27.132	1.757	2.2
	27.146	1.726	2.2
	27.16	1.69	2.192
	27.174	1.661	2.202
	27.188	1.627	2.204
	27.202	1.599	2.2
	27.216	1.58	2.209
	27.23	1.554	2.212
	27.244	1.524	2.203
	27.258	1.501	2.183
	27.272	1.479	2.189
	27.286	1.458	2.19
	27.3	1.432	2.19
	27.314	1.419	2.19
	27.328	1.391	2.199
	27.342	1.361	2.198
	27.356	1.344	2.196
	27.37	1.33	2.197
	27.384	1.313	2.19
	27.398	1.291	2.19
	27.412	1.27	2.19
	27.426	1.253	2.182
	27.44	1.24	2.181
	27.454	1.23	2.194
	27.468	1.214	2.18
	27.482	1.2	2.178
	27.496	1.187	2.178
	27.51	1.176	2.192
	27.524	1.163	2.194
	27.538	1.16	2.192
	27.552	1.157	2.185
	27.566	1.141	2.191
	27.58	1.132	2.2
	27.594	1.13	2.193
	27.608	1.123	2.19
	27.622	1.114	2.197
	27.636	1.101	2.2
	27.65	1.099	2.193
	27.664	1.085	2.19
	27.678	1.071	2.188
	27.692	1.06	2.18
	27.706	1.05	2.18
	27.72	1.041	2.18
	27.734	1.04	2.183
	27.748	1.038	2.188
	27.762	1.03	2.18
	27.776	1.03	2.18
	27.79	1.024	2.173
	27.804	1.011	2.17
	27.818	1.015	2.178
	27.832	1.011	2.19
	27.846	1.001	2.19
	27.86	0.988	2.183
	27.874	0.988	2.171
	27.888	0.996	2.178
[truncated: 203 more rows]
