# Supplementary material for: Discovery of the 1-naphthylamine biodegradation pathway reveals a broad-substrate-spectrum enzyme catalyzing 1-naphthylamine glutamylation
Source: eLife journal article supplement (doi:10.7554/elife.95555), 2024-07-26
Supplement: fig4-figsupp2-data1 [file Figure_4-figure_supplement_2-source_data_1.xlsx]

## Sheet: Figure_4─figure_supplement_2
	Figure_4─figure_supplement_2. Conserved residues and mutant analysis of ligand binding sites
		Y1	Y2	Y3	Y	STDEV
	WT	100	100	100	100	0
	Y51A	4.2	2.2	5.3	3.9	1.57162
	E162A	0	0	0	0	0
	E164A	13.82	11.4	17.31	14.1767	2.9711
	S230A	0.71	1.42	0.92	1.01667	0.364737
	R234A	0	0	0	0	0
	E241A	0	0	0	0	0
	T243A	9.62	6.42	14.24	10.0933	3.93143
	H291A	9.23	5.89	15.01	10.0433	4.61408
	H293A	14.32	25.34	20.08	19.9133	5.51189
	S295A	3.78	2.51	3.22	3.17	0.636475
	R345A	1.33	0.86	0.82	1.00333	0.283608
	K363A	0	0	0	0	0
	K363R	6.89	3.95	9.89	6.91	2.97005
	R368A	4.33	2.95	1.78	3.02	1.27644
	E381A	0	0	0	0	0
	R383A	0	0	0	0	0
	Mutational analysis of important residues participating in binding substrate and catalysis. Error bars represent the standard deviation of three biological replicates.
