# Supplementary material for: Discovery of the 1-naphthylamine biodegradation pathway reveals a broad-substrate-spectrum enzyme catalyzing 1-naphthylamine glutamylation
Source: eLife journal article supplement (doi:10.7554/elife.95555), 2024-07-26
Supplement: fig5-data1 [file Figure_5-source_data_1.xlsx]

## Sheet: Figure_5-source_data_1
	Figure 5B Residues involved in 1NA binding tunnel.
		1NA										Alinine
		Specific activity				Relative activity						Specific activity				Relative activity
		U/g				%				STDEVA		U/g				%				STDEVA
		Y1	Y2	Y3	Y	Y1	Y2	Y3	Y			Y1	Y2	Y3	Y	Y1	Y2	Y3	Y
	WT	20.2	22	22.6	21.6	100	100	100	100	0		27	26.5	24.2	25.9	100	100	100	100	0
	F75A	0.1142	0.12	0.1109	0.115033	0.565347	0.545455	0.490708	0.533836	0.0386519		0.1512	0.1431	0.121	0.138433	0.56	0.54	0.5	0.533333	0.0305505
	F86A	1.087	4.569	4.38	3.34533	5.38119	20.7682	19.3805	15.1766	8.51143		0	0	0	0	0	0	0	0	0
	M81A	3.1108	5.28	6.04	4.81027	15.4	24	26.7257	22.0419	5.91129		0	0	0	0	0	0	0	0	0
	M81W	0.38	0.1925	0.642	0.404833	1.88119	0.875	2.84071	1.86563	0.982946		2.567	2.6	2.6	2.589	9.50741	9.81132	10.7438	10.0208	0.644277
	W235A	0	0	0	0	0	0	0	0	0		0	0	0	0	0	0	0	0	0
	W235L	3.48	3.3	8.54	5.10667	17.2277	15	37.7876	23.3384	12.5628		5.6889	5.33975	5.413	5.48055	21.07	20.15	22.3678	21.1959	1.11423
	M81W/W235L	0	0	0	0	0	0	0	0	0		2.19789	1.65979	1.78825	1.88198	8.14033	6.26336	7.38946	7.26438	0.944718
	Relative activity of mutants for 1NA binding tunnel. The activity of wild-type NpaA1 for 1NA is set to 100% (21.6±1.2 U/g), and wild-type NpaA1 showed equivalent activity to 1NA and aniline. Error bars represent the standard deviation of three biological replicates.
	Figure 5C Residues involved in 1NA binding.
		1NA										Alinine
		Specific activity				Relative activity						Specific activity				Relative activity
		U/g				%				STDEVA		U/g				%				STDEVA
		Y	Y1	Y2	Y3	Y1	Y2	Y3	Y			Y1	Y2	Y3	Y	Y1	Y2	Y3	Y
	WT	27.2333	27.4	28.3	26	100	100	100	100	0		20.98	18.92	25.21	21.7033	100	100	100	100	0
	V201A	5.46667	4.2	7.8	4.4	15.3285	27.5618	16.9231	19.9378	6.65058		8.19	9.32	4.29	7.26667	39.0372	49.26	17.0171	35.1048	16.4773
	V201C	0	0	0	0	0	0	0	0	0		0	0	0	0	0	0	0	0	0
	V201D	0	0	0	0	0	0	0	0	0		0	0	0	0	0	0	0	0	0
	V201E	0	0	0	0	0	0	0	0	0		0	0	0	0	0	0	0	0	0
	V201F	4.06667	3	4.2	5	10.9489	14.841	19.2308	15.0069	4.14342		7.2	5.29	9.91	7.46667	34.3184	27.9598	39.3098	33.8627	5.68869
	V201G	0	0	0	0	0	0	0	0	0		0	0	0	0	0	0	0	0	0
	V201H	19.6667	21.5	16.3	21.2	78.4672	57.5972	81.5385	72.5343	13.0267		20.51	10.24	19.431	16.727	97.7598	54.1226	77.0766	76.3196	21.8284
	V201I	7.46667	7	6.3	9.1	25.5474	22.2615	35	27.603	6.61335		28.929	28.319	21.462	26.2367	137.888	149.678	85.1329	124.233	34.3709
	V201K	13.8	9.3	13.9	18.2	33.9416	49.1166	70	51.0194	18.1043		24.513	32.813	28.336	28.554	116.84	173.43	112.4	134.223	34.0267
	V201L	239.8	227.21	230.87	261.32	829.234	815.795	1005.08	883.369	105.617		51.42	81.358	63.127	65.3017	245.091	430.011	250.405	308.502	105.263
	V201M	11.5767	11.5	12.8	10.43	41.9708	45.2297	40.1154	42.4386	2.58904		52.93	32.67	65.37	50.3233	252.288	172.674	259.302	228.088	48.1176
	V201N	0	0	0	0	0	0	0	0	0		0	0	0	0	0	0	0	0	0
	V201P	15.3567	9.7	15.9	20.47	35.4015	56.1837	78.7308	56.772	21.6706		6.59	3.41	9.32	6.44	31.4109	18.0233	36.9695	28.8012	9.73896
	V201Q	23.85	30.12	26.81	14.62	109.927	94.735	56.2308	86.9643	27.6787		11.28	13.52	18.39	14.3967	53.7655	71.4588	72.9472	66.0572	10.6709
	V201R	0	0	0	0	0	0	0	0	0		0	0	0	0	0	0	0	0	0
	V201S	0	0	0	0	0	0	0	0	0		0	0	0	0	0	0	0	0	0
	V201T	0	0	0	0	0	0	0	0	0		0	0	0	0	0	0	0	0	0
	V201W	26.85	22.83	26.9	30.82	83.3212	95.053	118.538	98.9709	17.9326		8.73	5.42	14.3	9.48333	41.6111	28.6469	56.7235	42.3272	14.052
	V201Y	133.133	155.29	106.62	137.49	566.752	376.749	528.808	490.77	100.551		38.77	67.42	50.18	52.1233	184.795	356.342	199.048	246.729	95.1956
	Relative activity of saturation mutants for V201. The activity of wild-type NpaA1 for 1NA is set to 100% (27.2±1.2 U/g), and wild-type NpaA1 showed equivalent activity to 1NA and aniline. Error bars represent the standard deviation of three biological replicates.
