# Supplementary material for: Discovery of the 1-naphthylamine biodegradation pathway reveals a broad-substrate-spectrum enzyme catalyzing 1-naphthylamine glutamylation
Source: eLife journal article supplement (doi:10.7554/elife.95555), 2024-07-26
Supplement: table1-data1 [file Table_1-source_data_1.xlsx]

## Sheet: Table1
	Table 1 Specific activities of NpaA1 and AtdA1 against different substrates
		Unit (U/mg)
	NpaA1	Y1	Y2	Y3	STDEV
	Aniline	0.026	0.025	0.0255	0.000707107
	1-naphthylamine	0.024	0.027	0.0255	0.00212132
	3-chloroaniline	0.018	0.021	0.0195	0.00212132
	3,4-dichloroaniline	0.007	0.009	0.008	0.00141421
	2-naphthylamine	0.007	0.005	0.006	0.00141421
	1,5-naphthalenediamine	0.001	0.002	0.0015	0.000707107
	1,8-naphthalenediamine	0	0	0	0
	2,3-naphthalenediamine	0.003	0.001	0.002	0.00141421
	2,7-naphthalenediamine	0	0	0	0
	AtdA1
	Aniline	0.01	0.007	0.0085	0.00212132
	1-naphthylamine	0	0	0	0
	3-chloroaniline	0.003	0.002	0.0025	0.000707107
	3,4-dichloroaniline	0	0	0	0
	2-naphthylamine	0	0	0	0
	1,5-naphthalenediamine	0	0	0	0
	1,8-naphthalenediamine	0	0	0	0
	2,3-naphthalenediamine	0	0	0	0
	2,7-naphthalenediamine	0	0	0	0
	The specific activities of NpaA1 (25.5±0.7 U g-1) and AtdA1 (8.5±2.1 U g-1) against aniline were defined as 100%. The results are shown as averages ± standard deviations from two or more independent measurements.
